# Supplementary material for: Injury-induced perivascular niche supports alternative differentiation of adult rodent CNS progenitor cells
Source: PubMed Central journal article supplement (PMC6141235; doi:10.7554/elife.30325), 2018-09-17

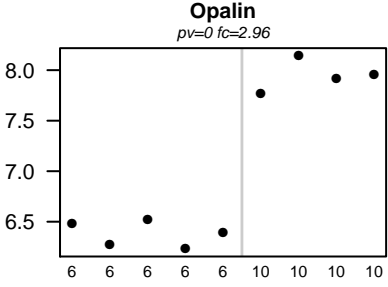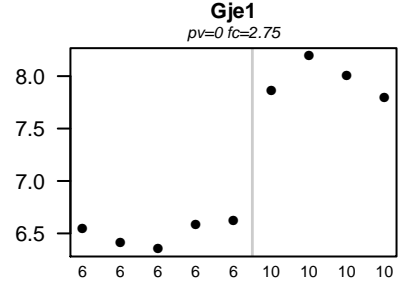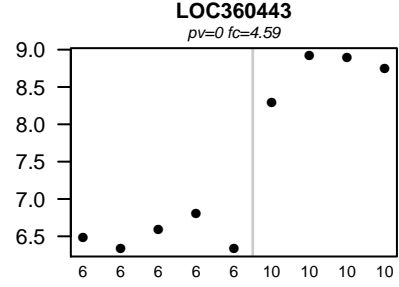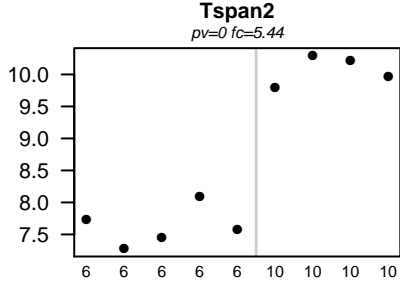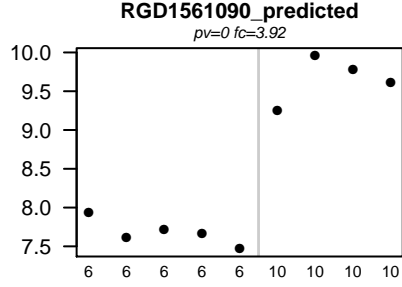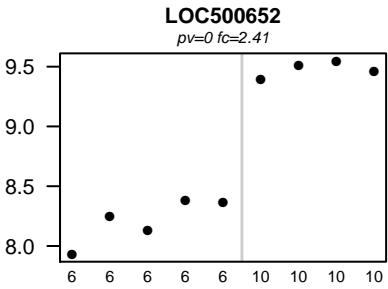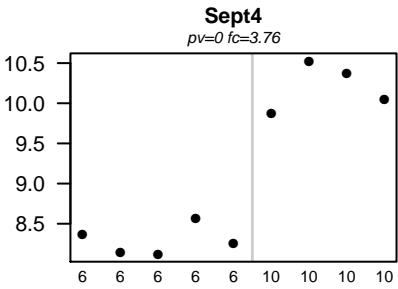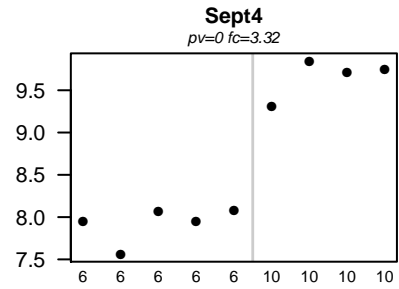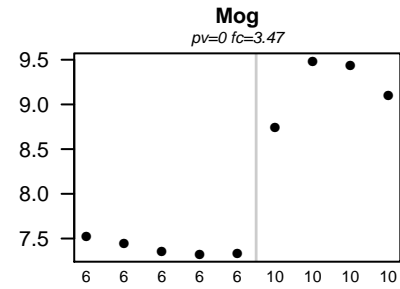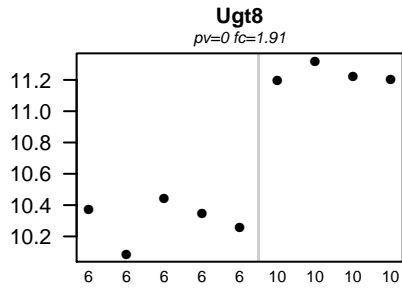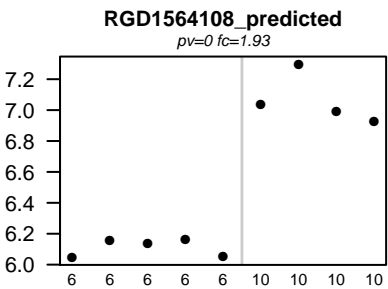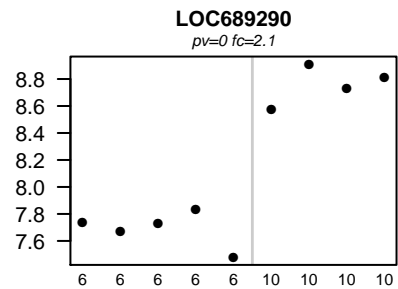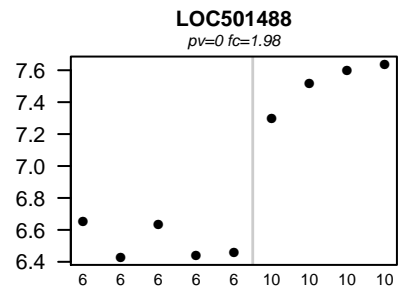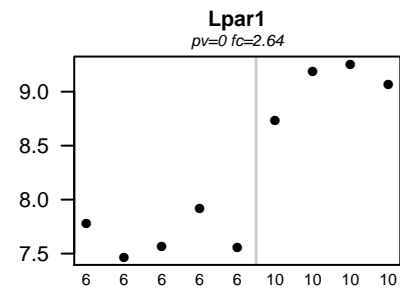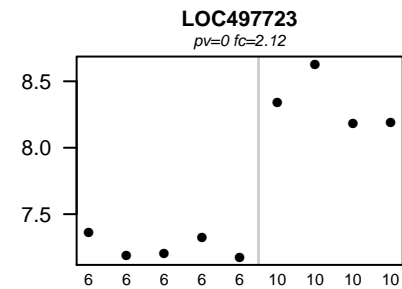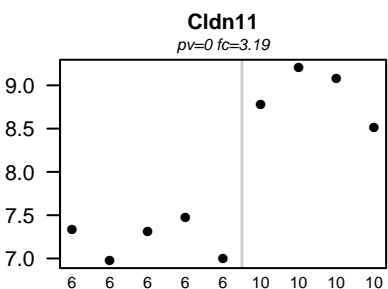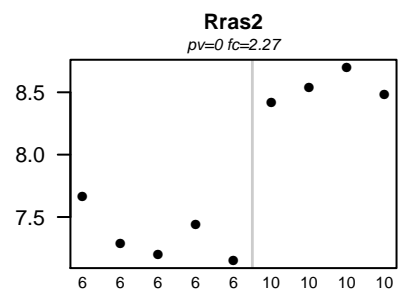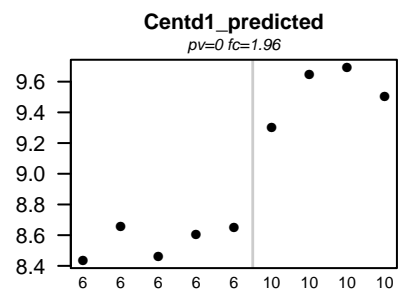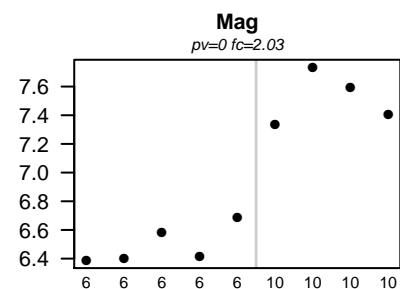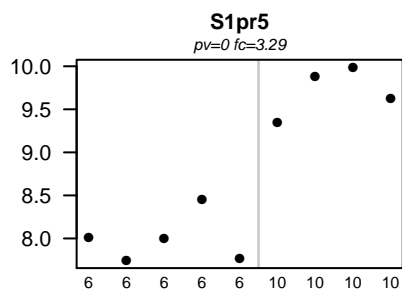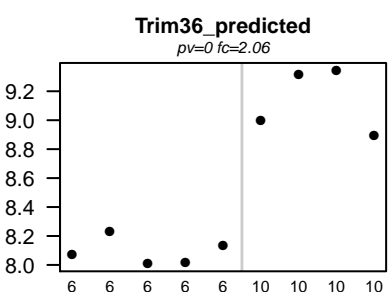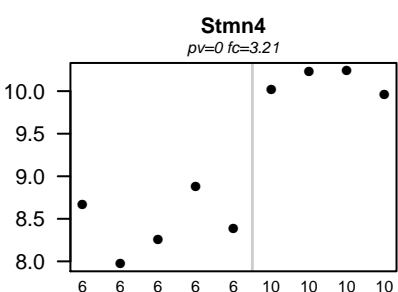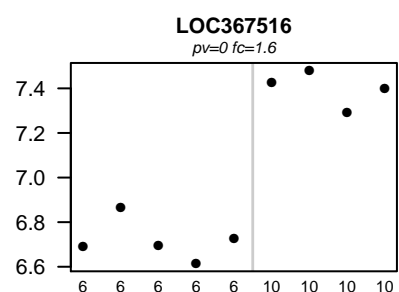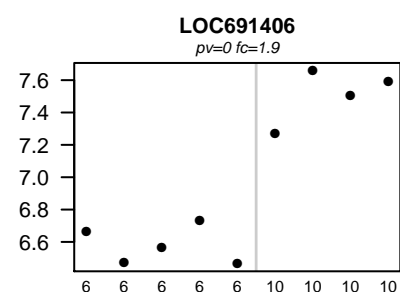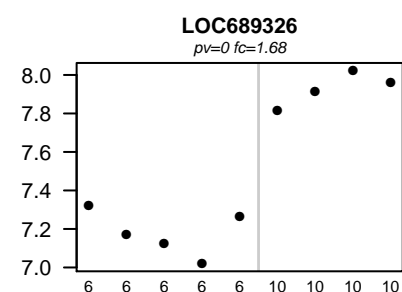

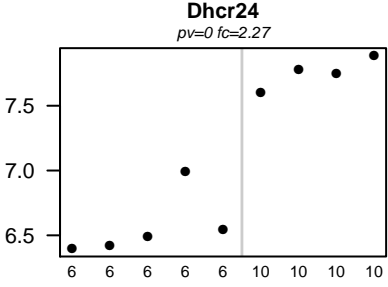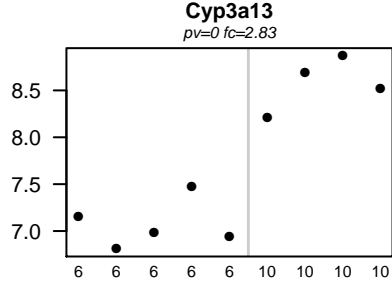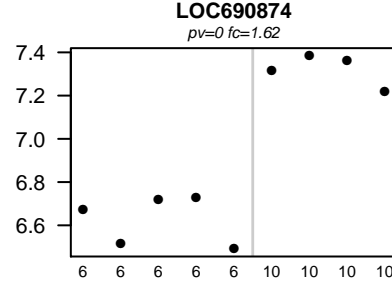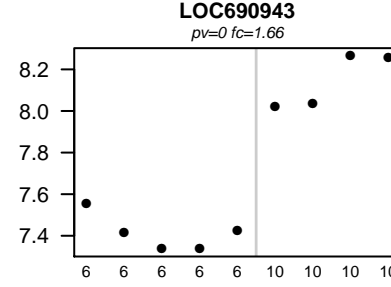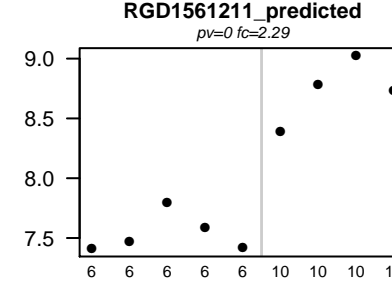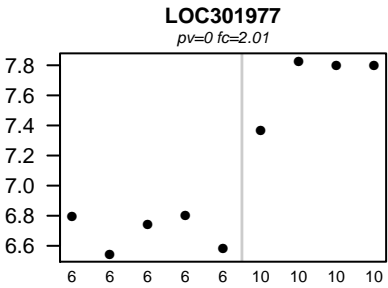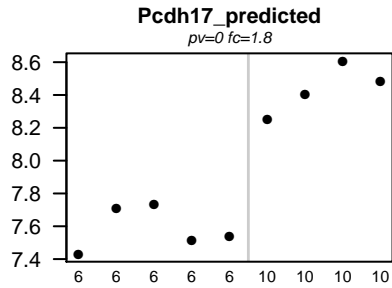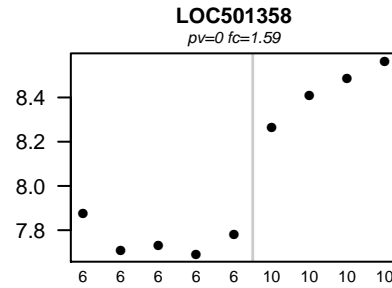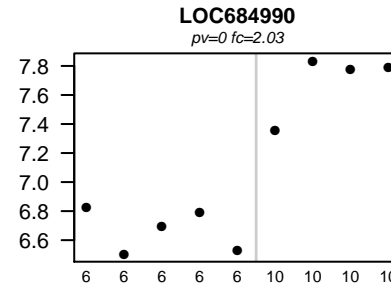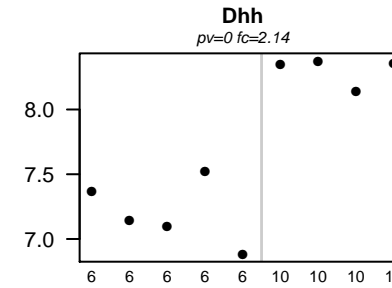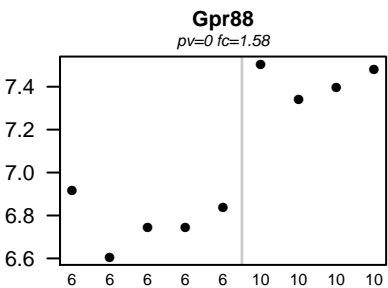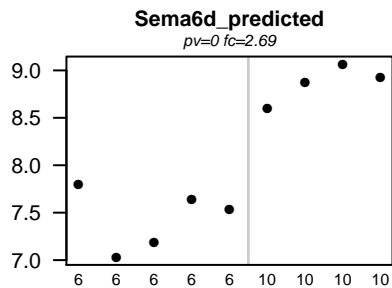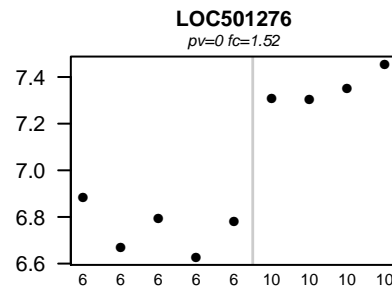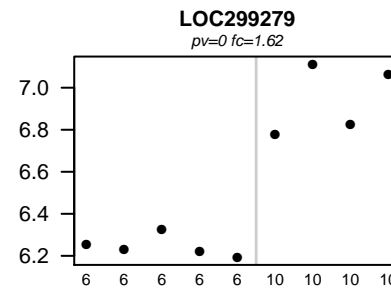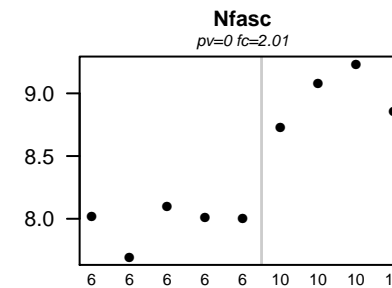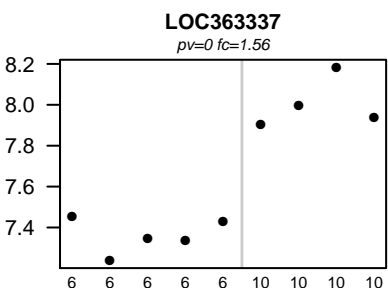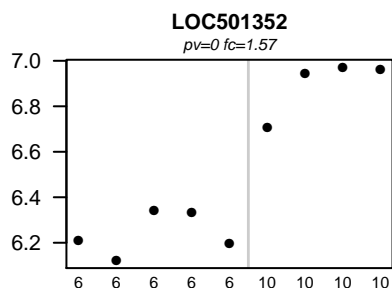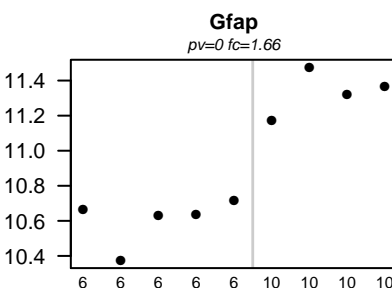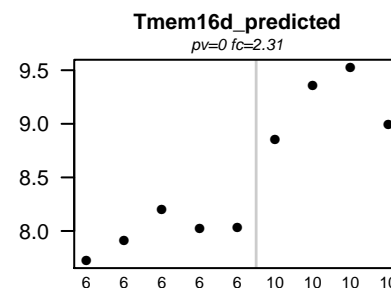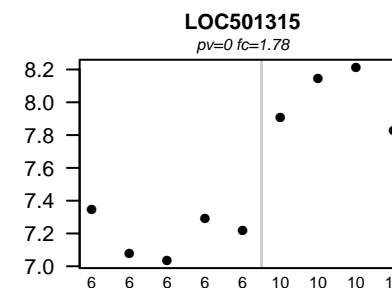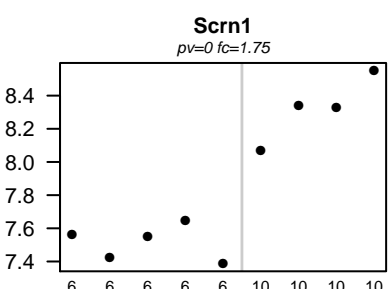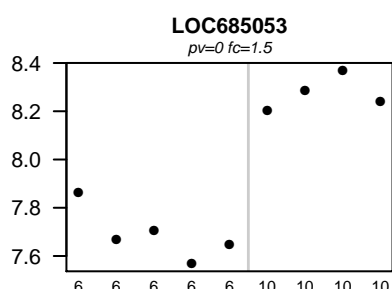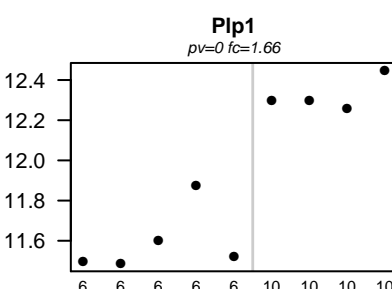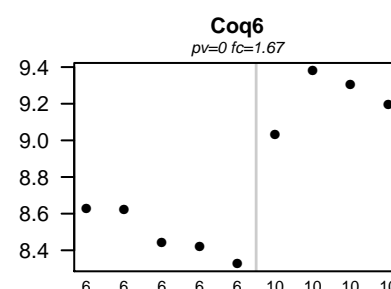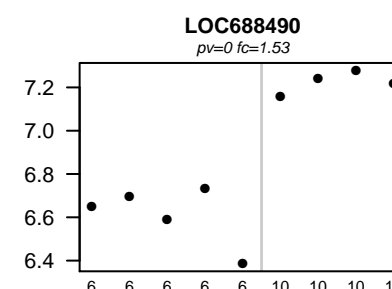

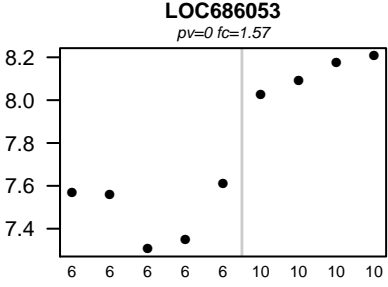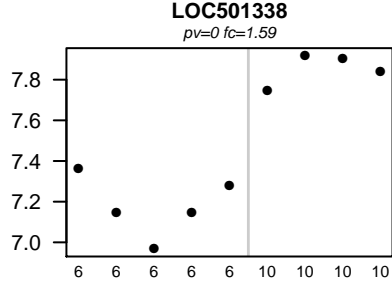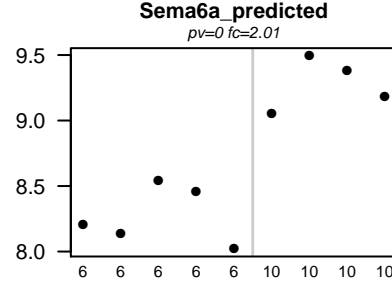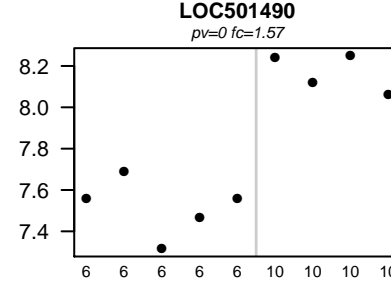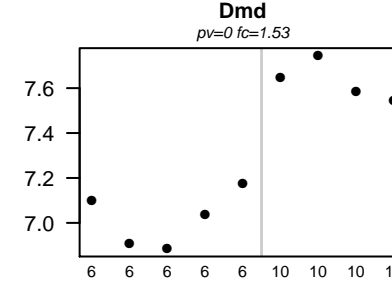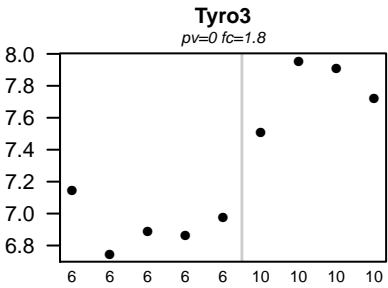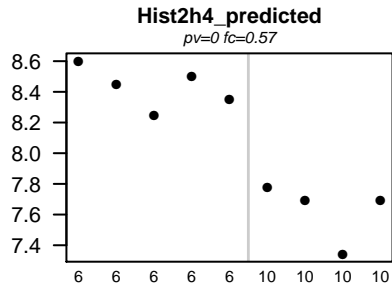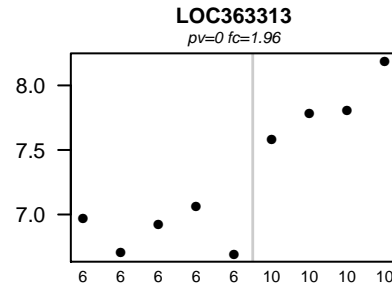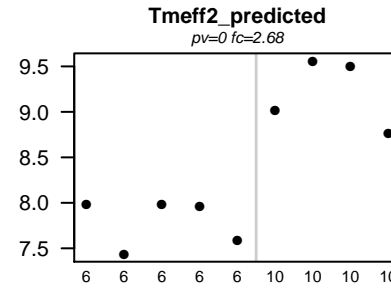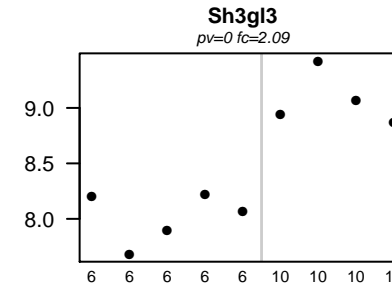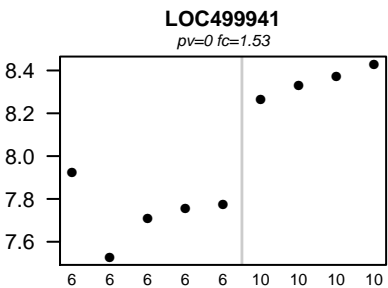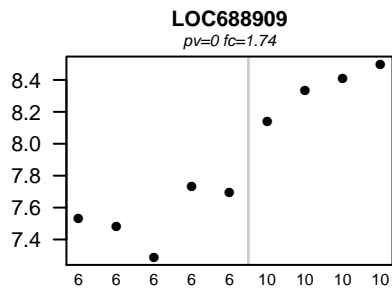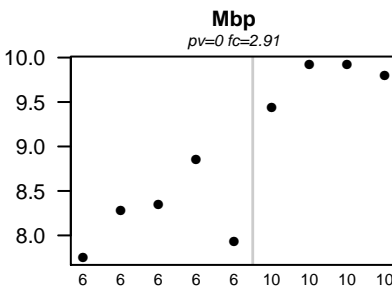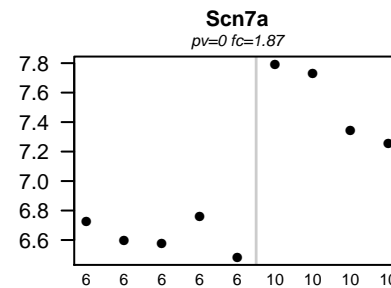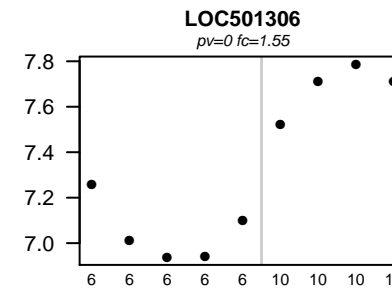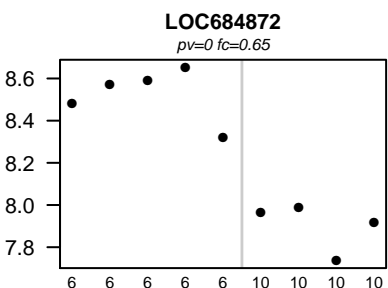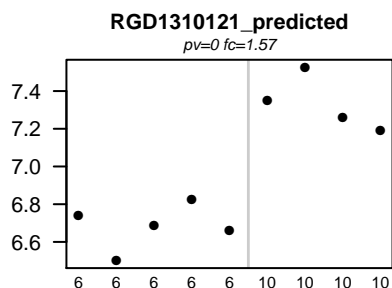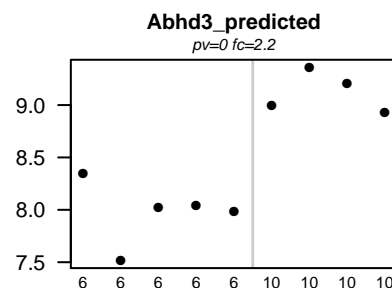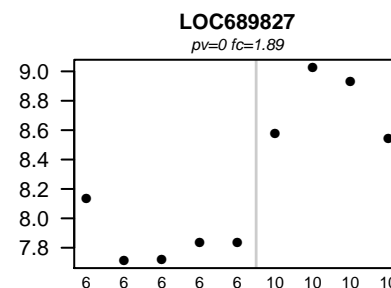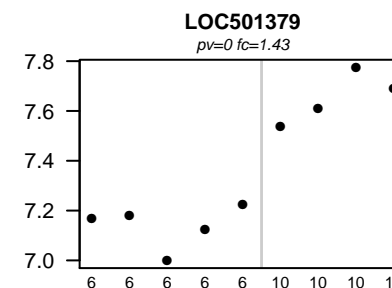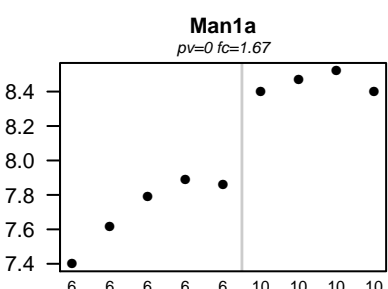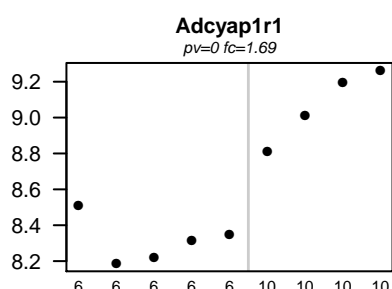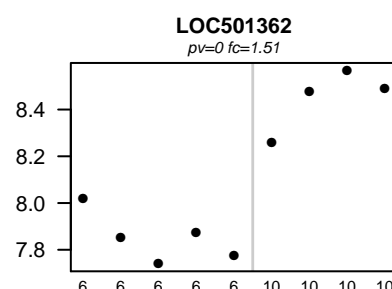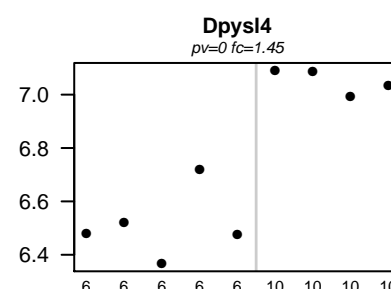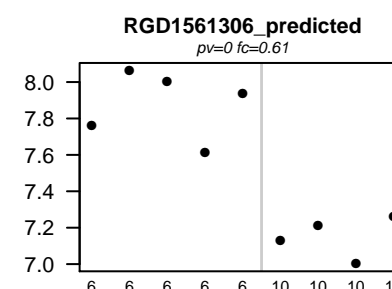

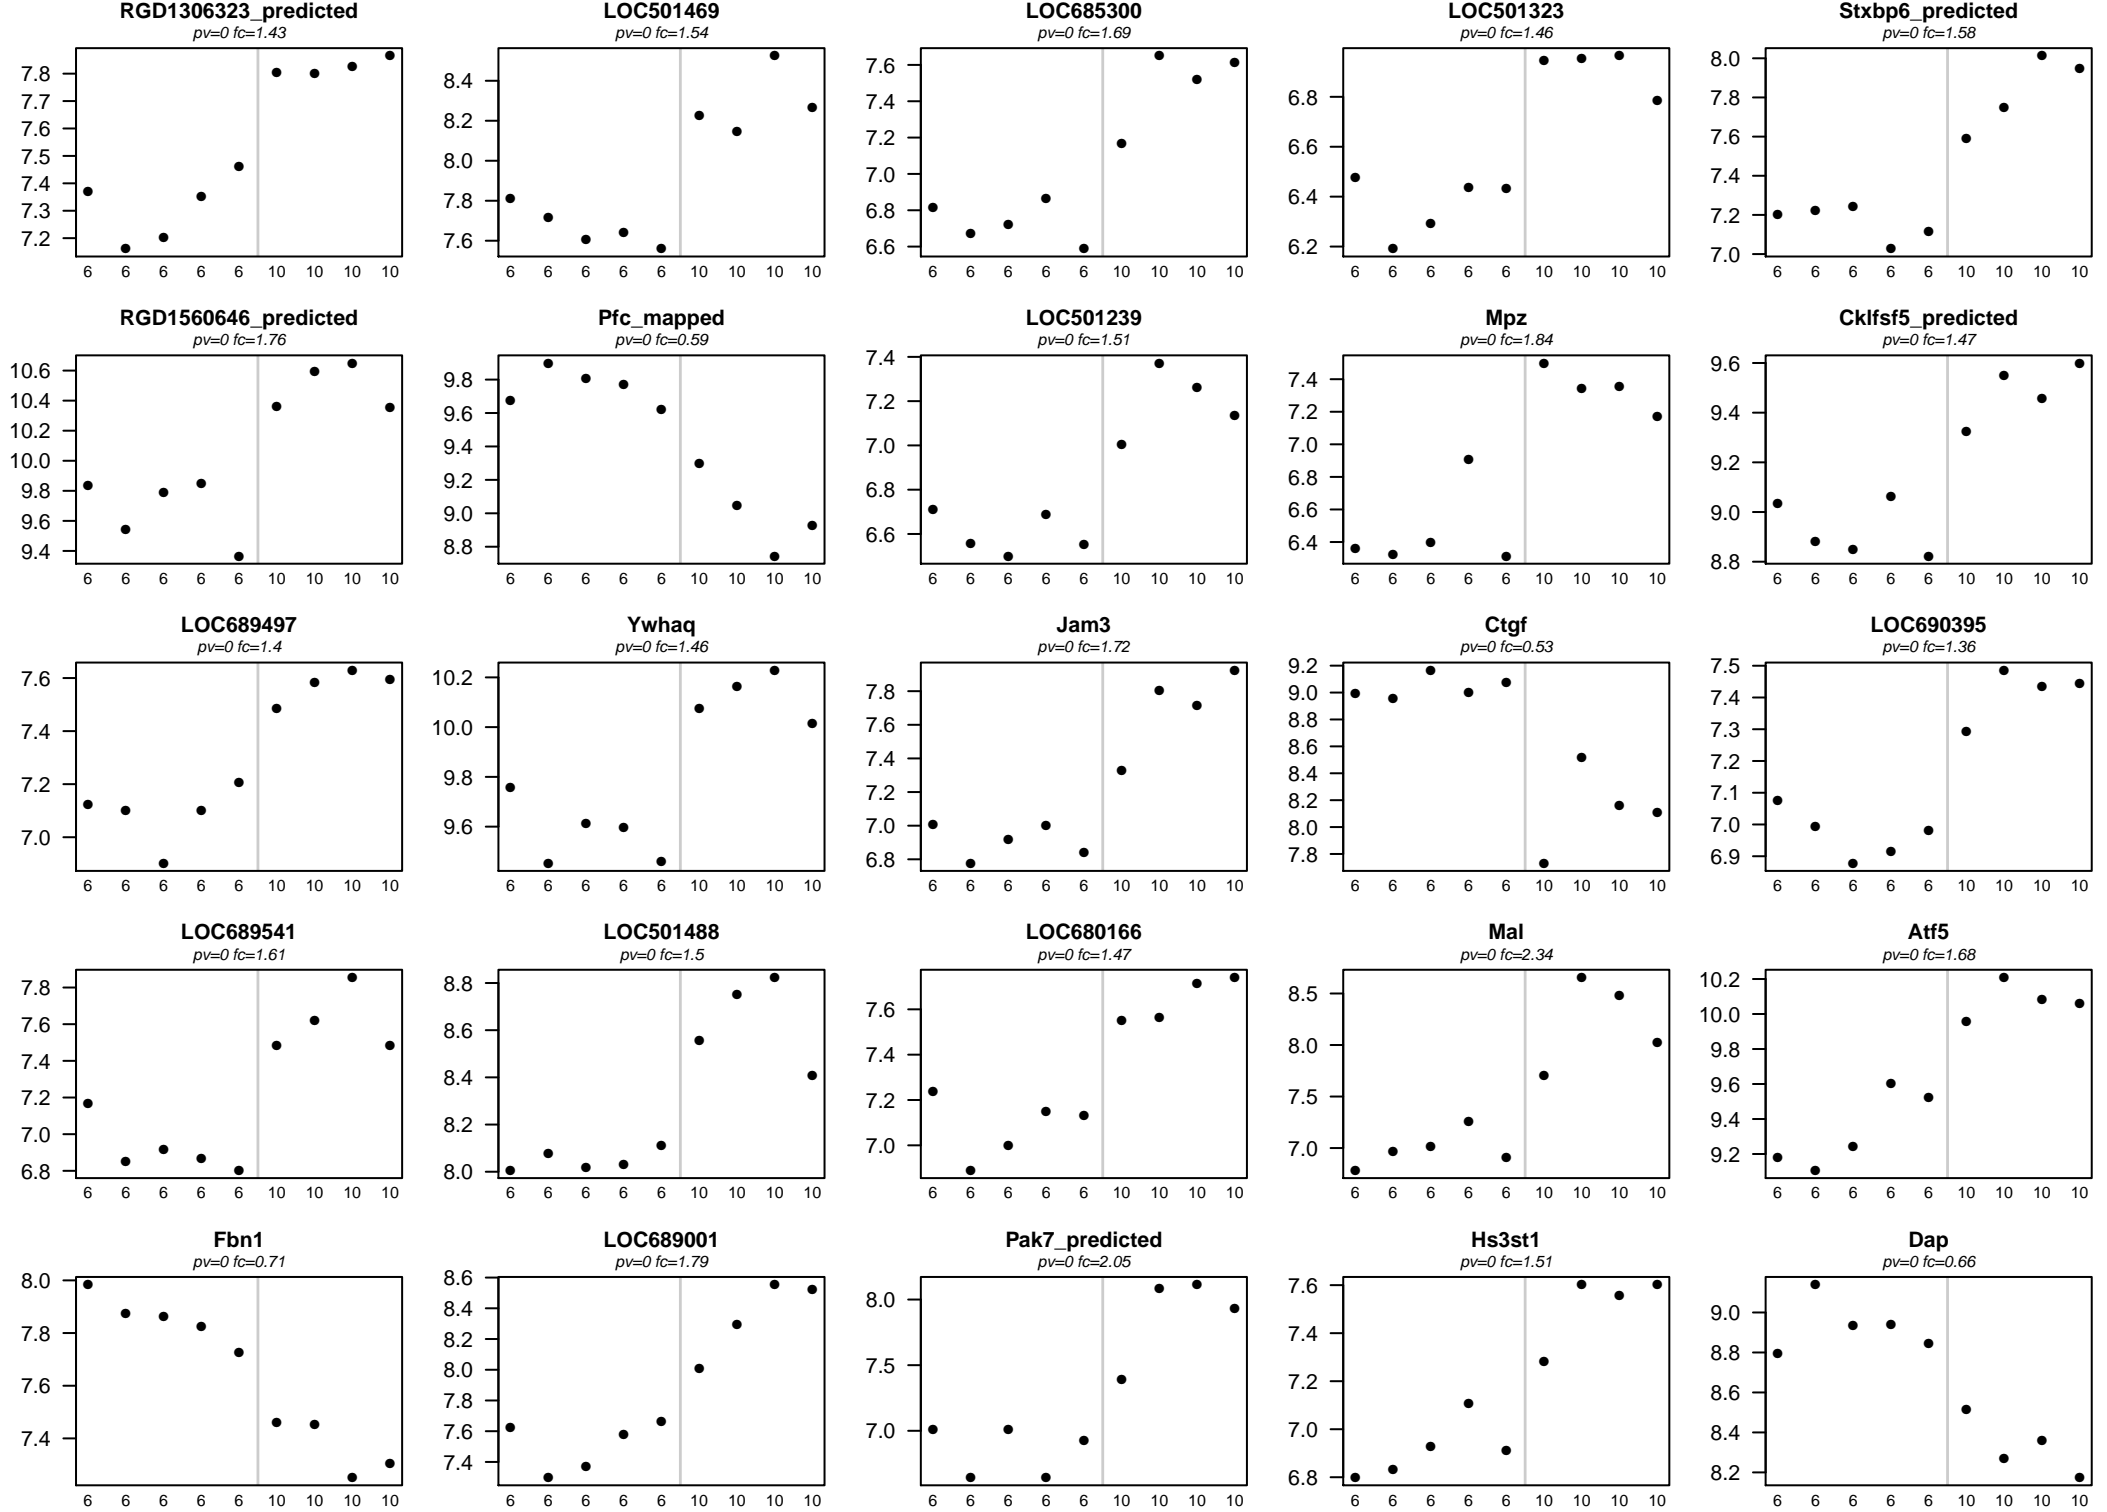

**Car14\_predicted***pv=0 fc=1.81*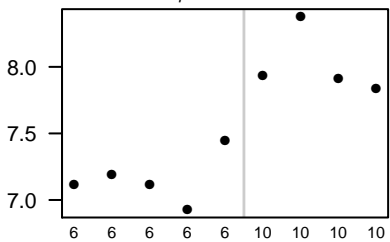**Tmem98***pv=0 fc=1.39*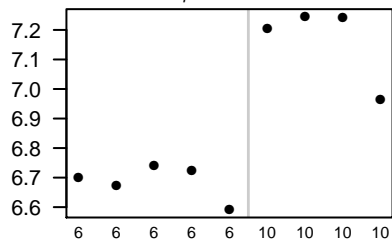**Rab6ip1\_predicted***pv=0 fc=1.38*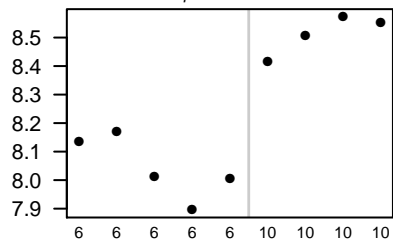**LOC691762***pv=0 fc=1.44*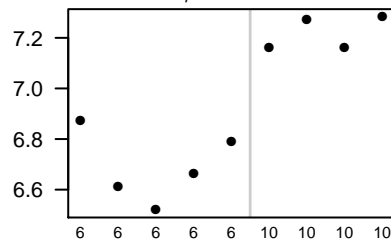**LOC691762***pv=0 fc=1.59*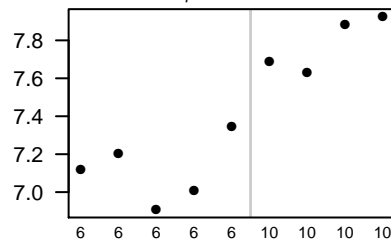**Cyp1b1***pv=0 fc=0.52*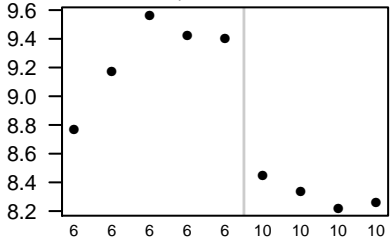**LOC296782***pv=0 fc=1.49*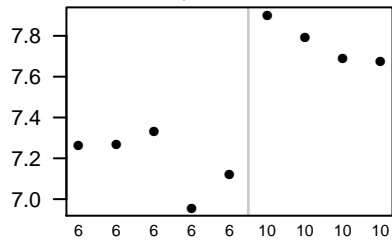**Ttyh1\_predicted***pv=0 fc=1.83*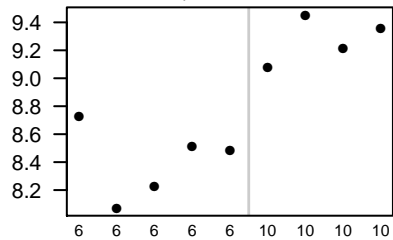**Dpysl3***pv=0 fc=0.56*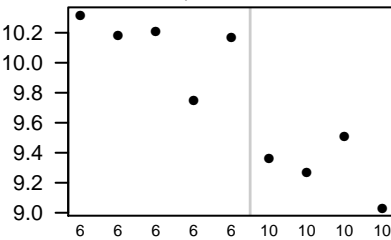**LOC501305***pv=0 fc=1.52*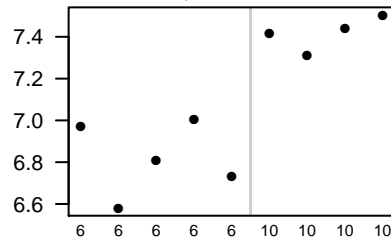**Prkcz***pv=0 fc=1.9*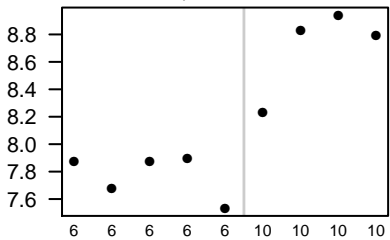**Agt***pv=0 fc=1.82*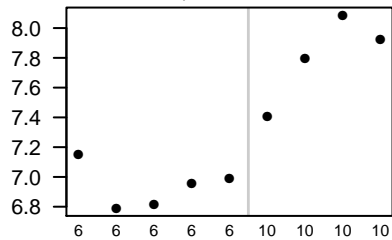**Hdac11\_predicted***pv=0 fc=1.78*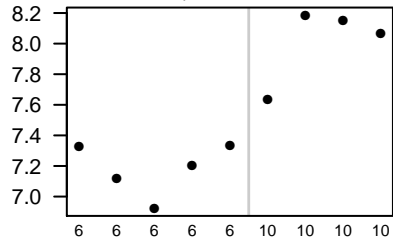**LOC689058***pv=0 fc=1.45*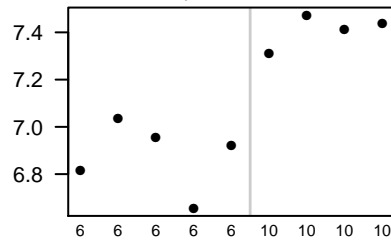**RGD1311960\_predicted***pv=0 fc=1.53*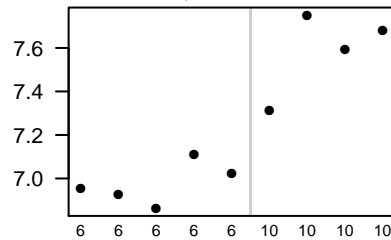**Mrc1\_predicted***pv=0 fc=0.71*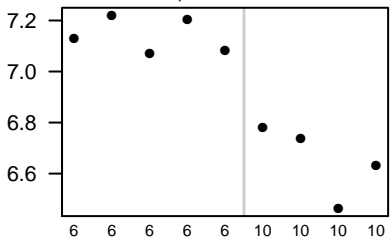**RGD1566201\_predicted***pv=0 fc=1.5*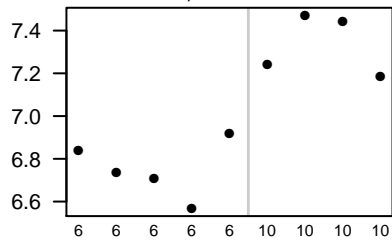**Cav1***pv=0 fc=0.68*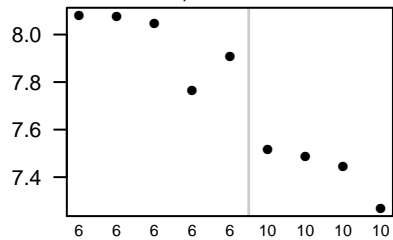**Dusp10\_predicted***pv=0 fc=1.96*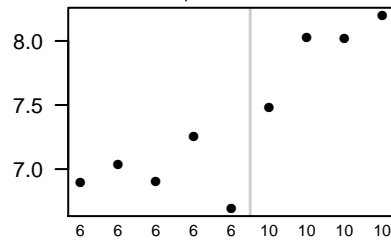**Sh3rf1***pv=0 fc=0.63*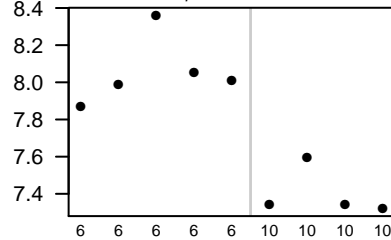**Cyp7b1***pv=0 fc=1.37*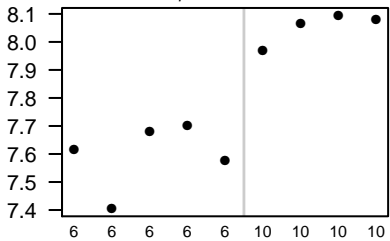**LOC501347***pv=0 fc=1.51*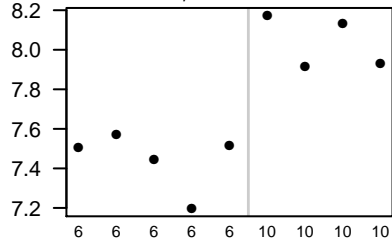**LOC501287***pv=0 fc=1.42*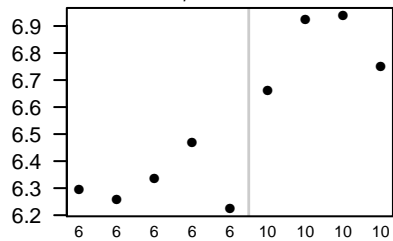**LOC689658***pv=0 fc=1.44*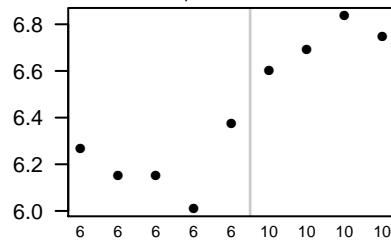**RGD1308367***pv=0 fc=2.18*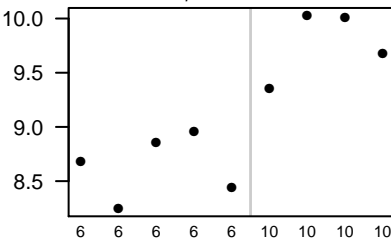

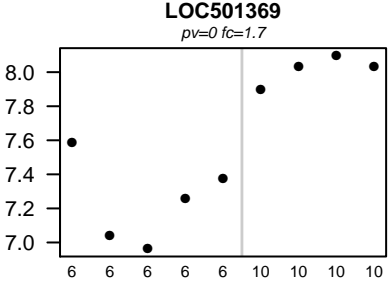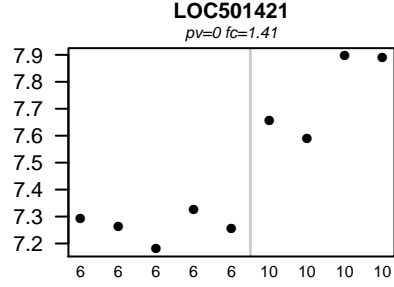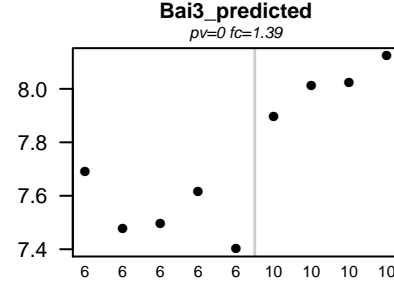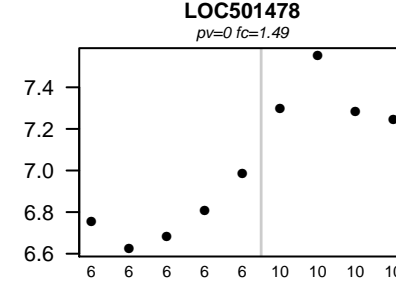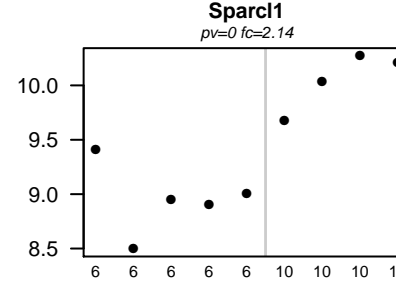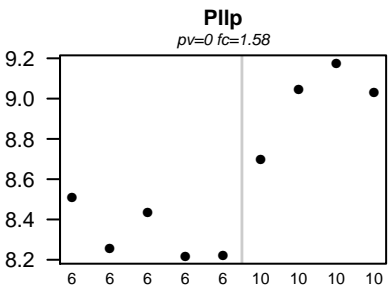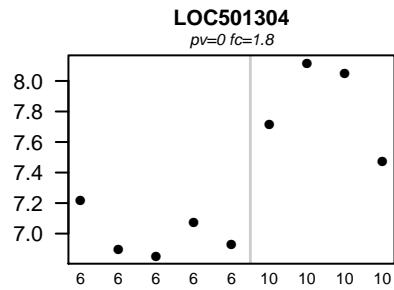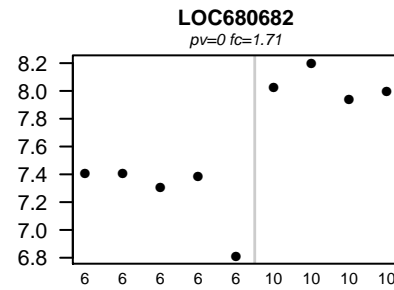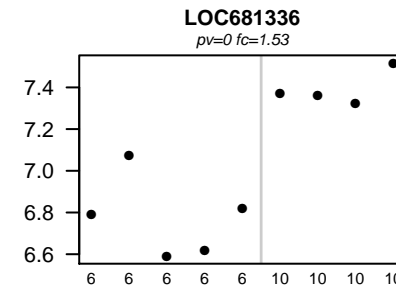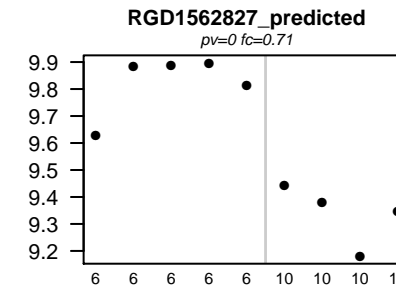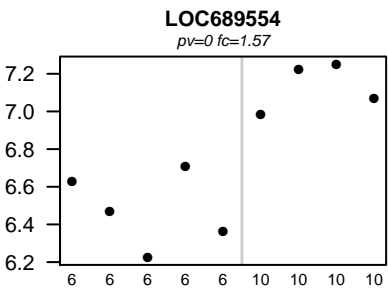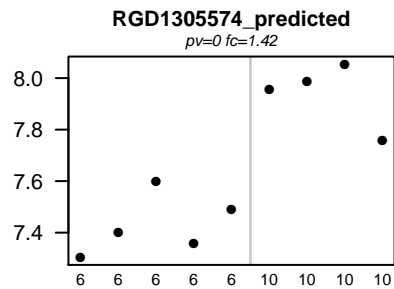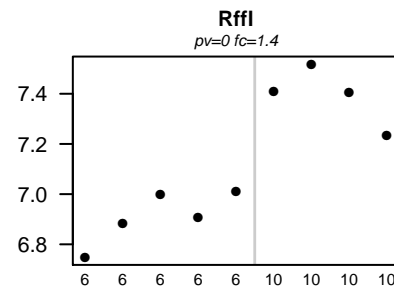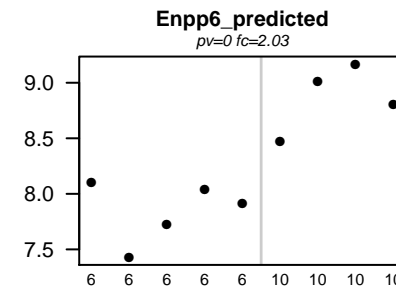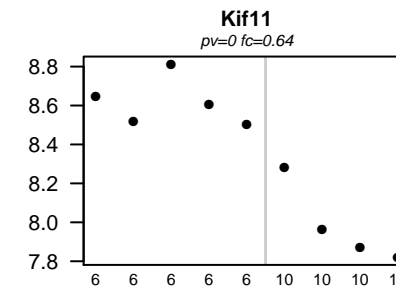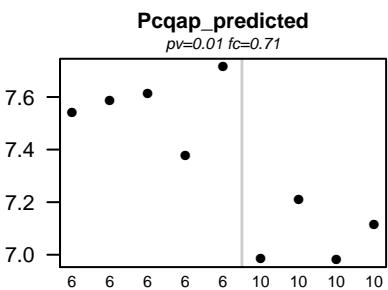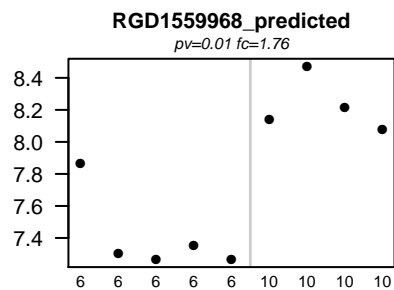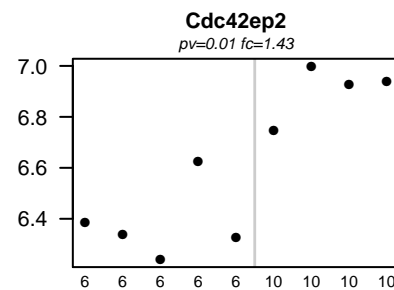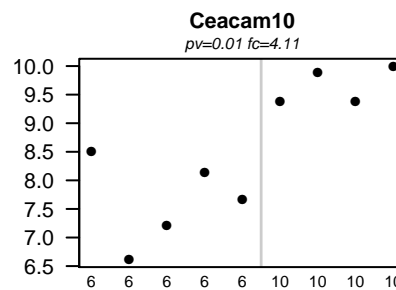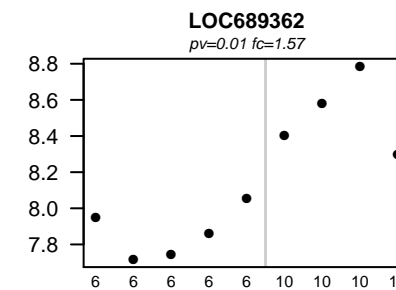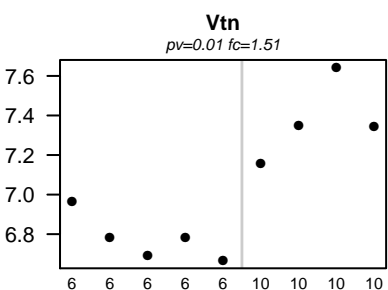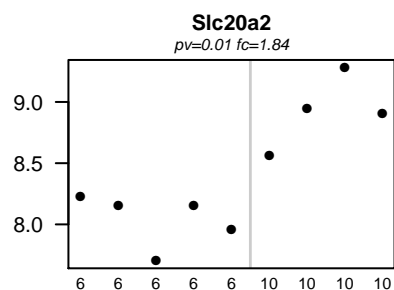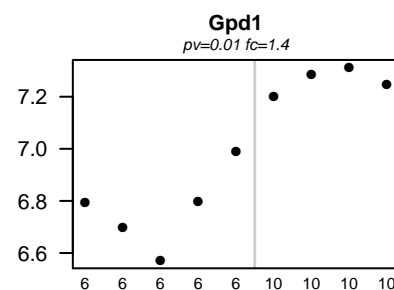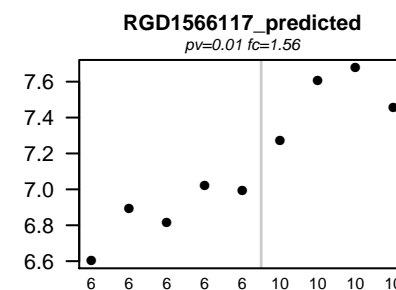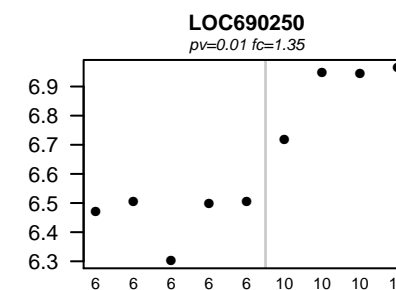

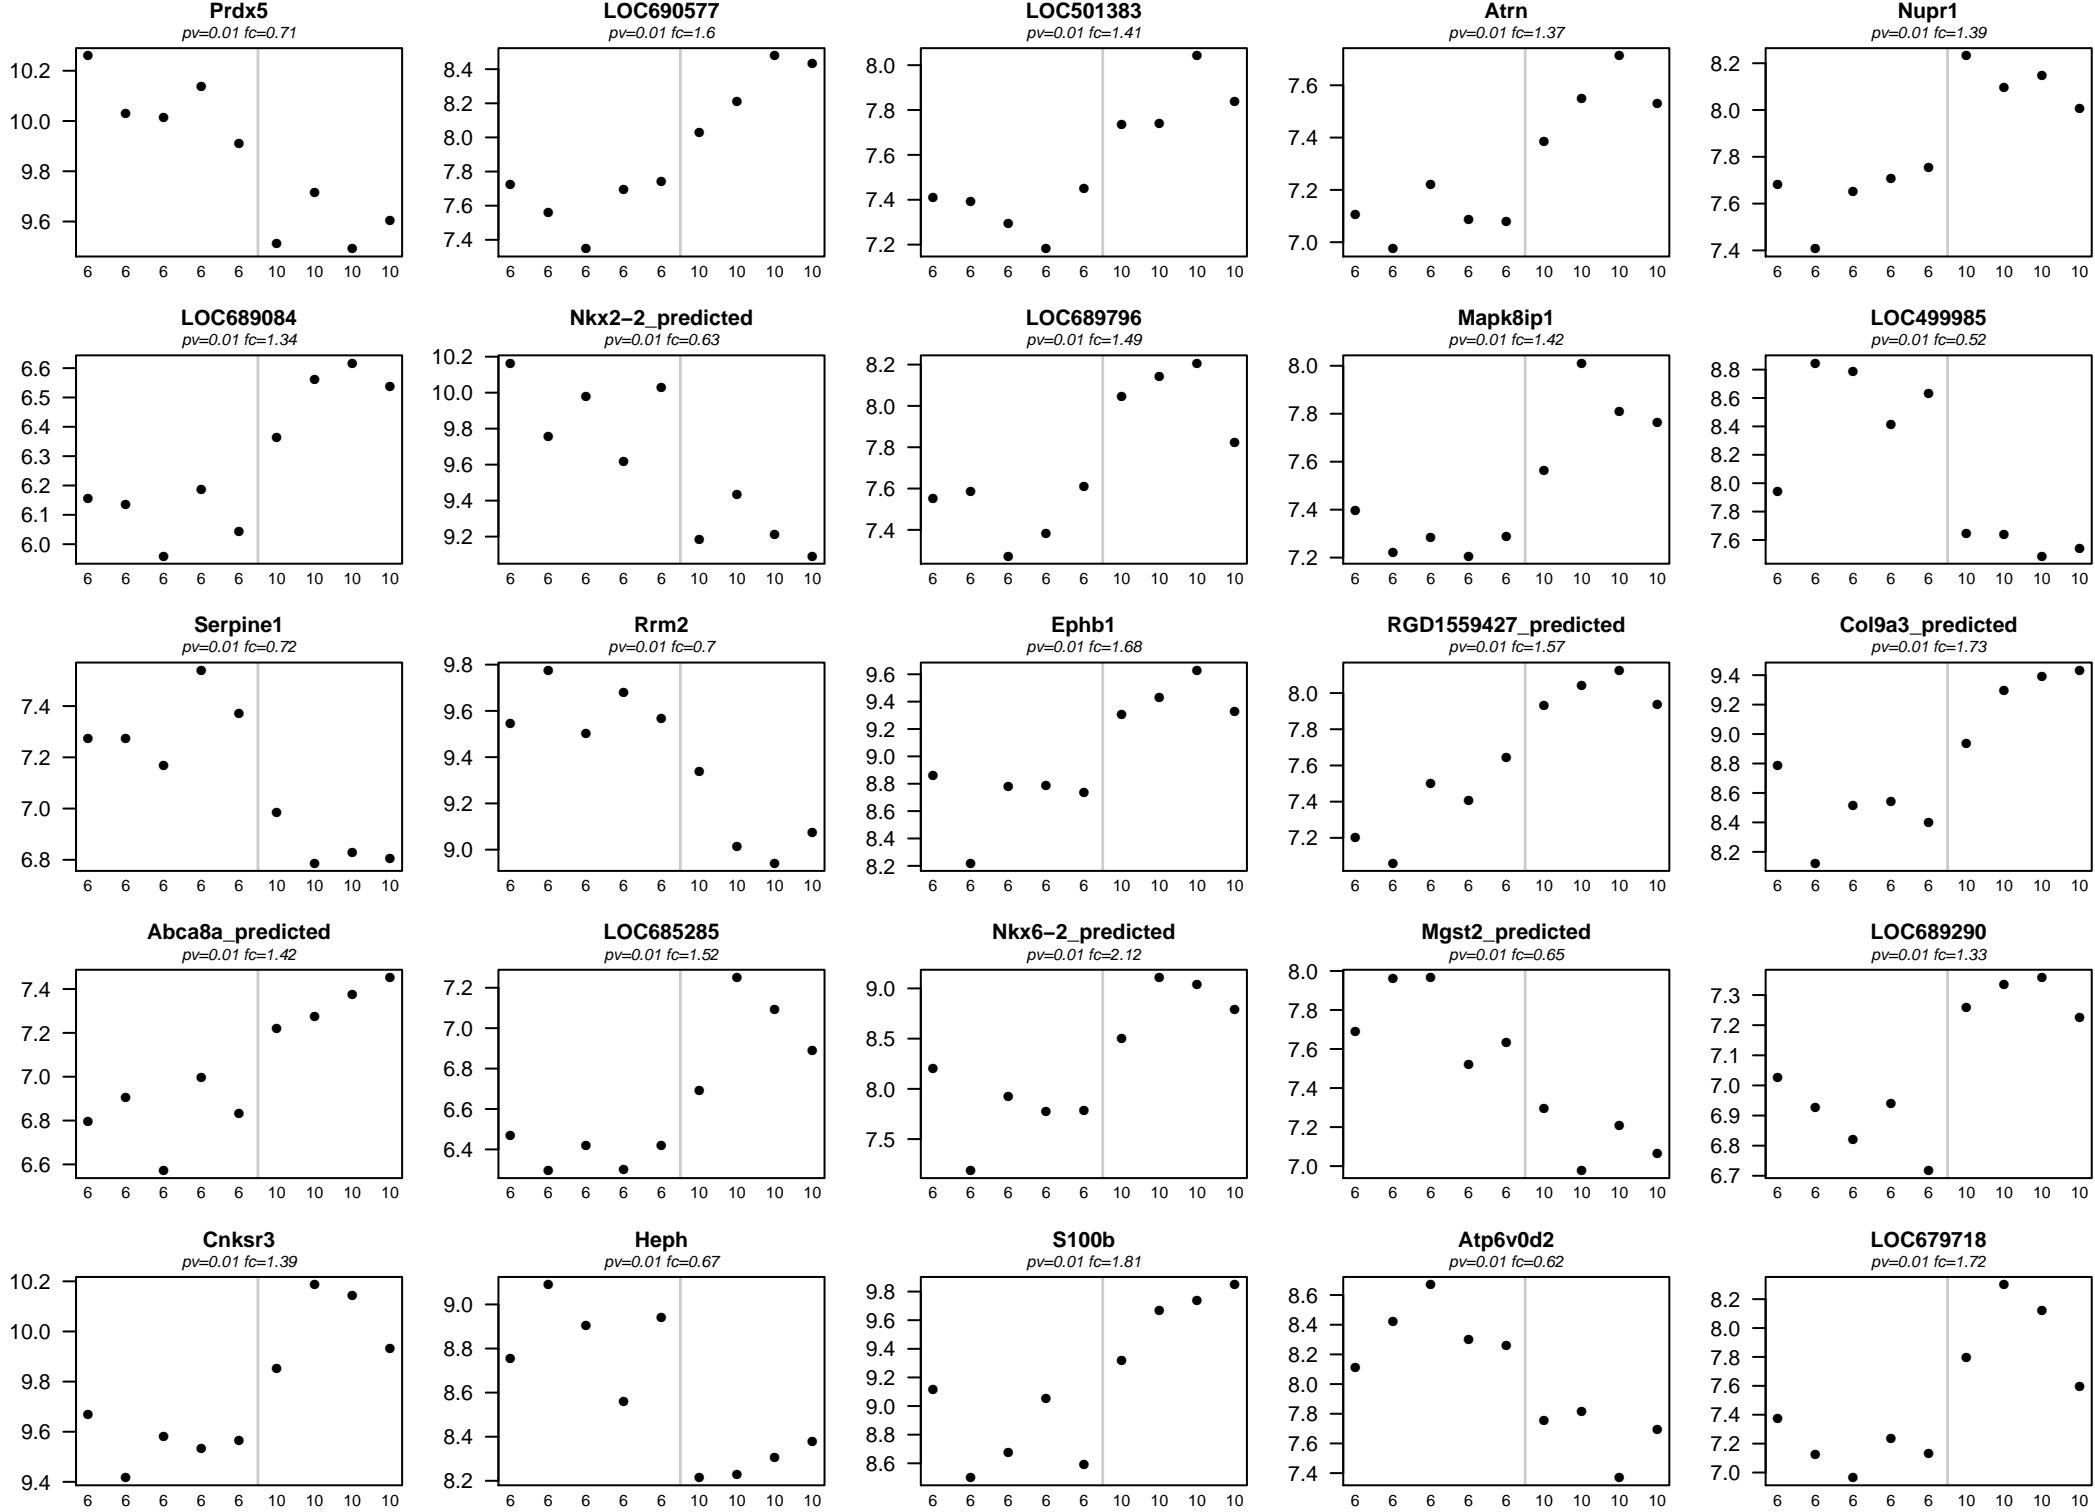

**RGD1308626***pv=0.01 fc=1.7*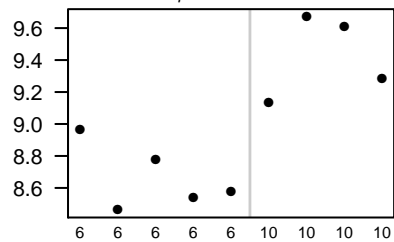**Adpgk***pv=0.01 fc=1.46*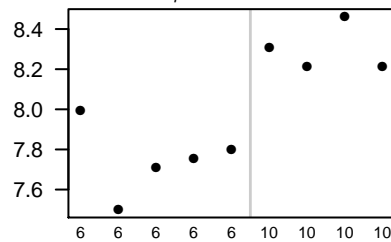**LOC501469***pv=0.01 fc=1.44*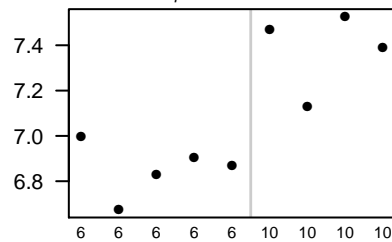**RGD1562952\_predicted***pv=0.01 fc=1.45*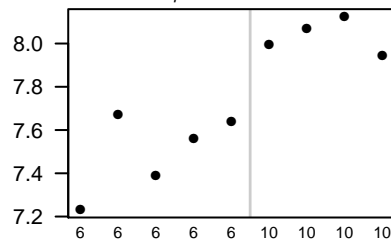**LOC688587***pv=0.01 fc=1.38*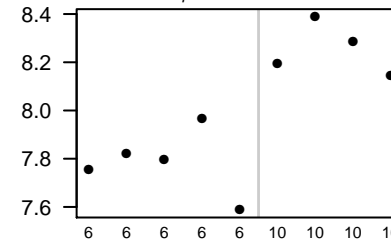**Thtpa***pv=0.01 fc=1.63*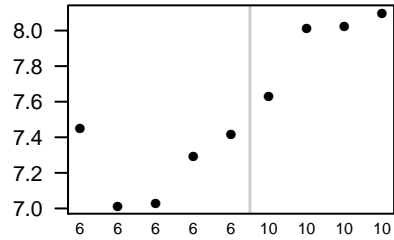**LOC691712***pv=0.01 fc=1.35*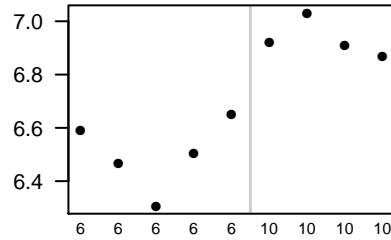**Syt11***pv=0.01 fc=1.56*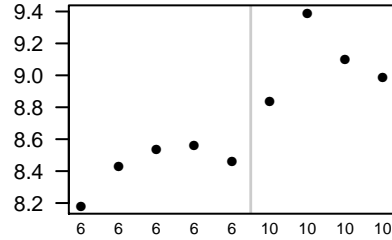**Fah***pv=0.01 fc=1.56*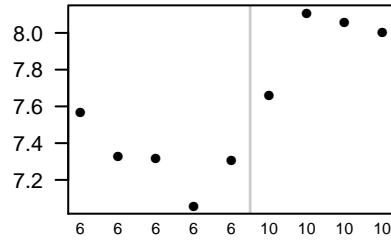**Ppp1r14a***pv=0.01 fc=1.79*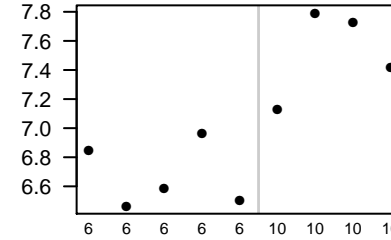**RGD1565738\_predicted***pv=0.01 fc=0.75*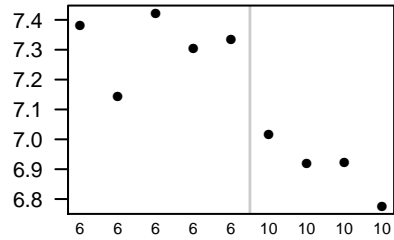**Rgs18***pv=0.01 fc=0.63*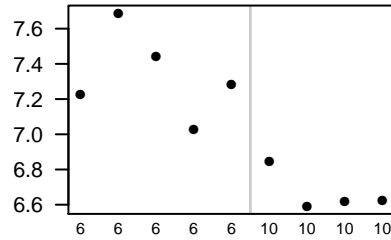**LOC501361***pv=0.01 fc=1.48*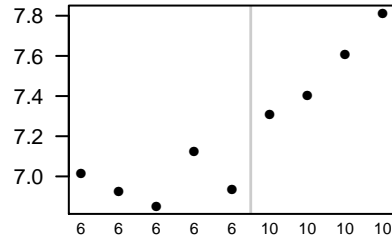**Ndrp2***pv=0.01 fc=1.84*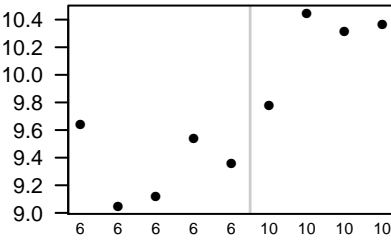**Bmpr1a***pv=0.01 fc=1.35*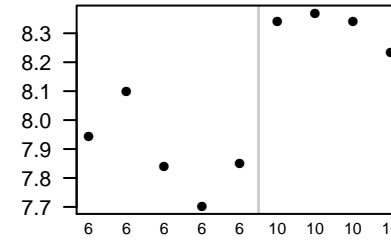**RGD1307201\_predicted***pv=0.01 fc=0.68*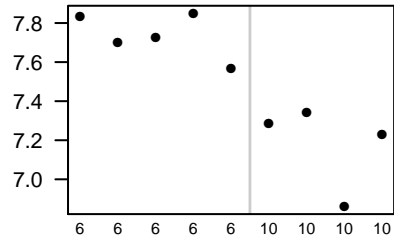**LOC501315***pv=0.01 fc=1.42*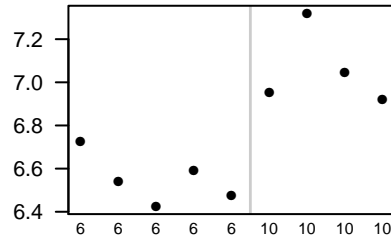**Pls1\_predicted***pv=0.01 fc=1.44*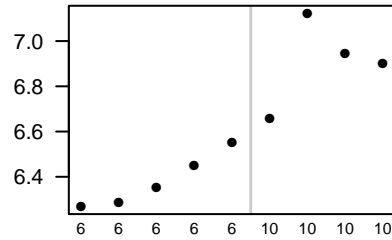**LOC501479***pv=0.01 fc=1.83*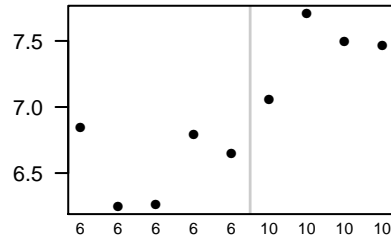**RGD1564998\_predicted***pv=0.01 fc=1.44*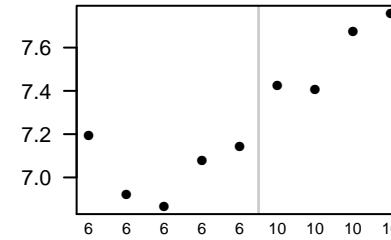**Dirc2***pv=0.01 fc=1.42*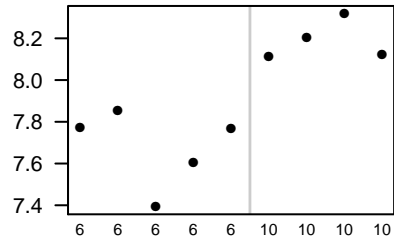**Mcsm***pv=0.01 fc=1.5*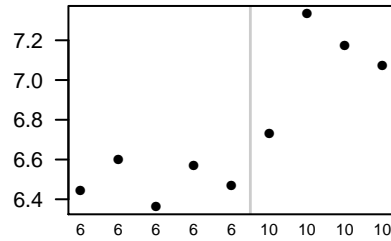**Lfng***pv=0.01 fc=0.74*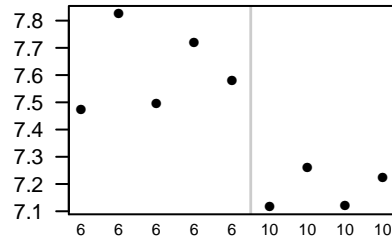**LOC500409***pv=0.01 fc=1.58*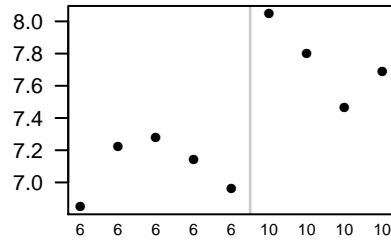**LOC501302***pv=0.01 fc=1.35*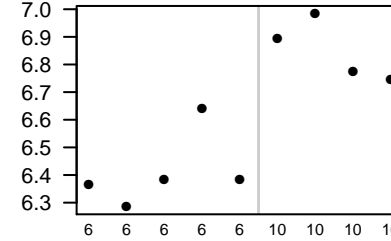



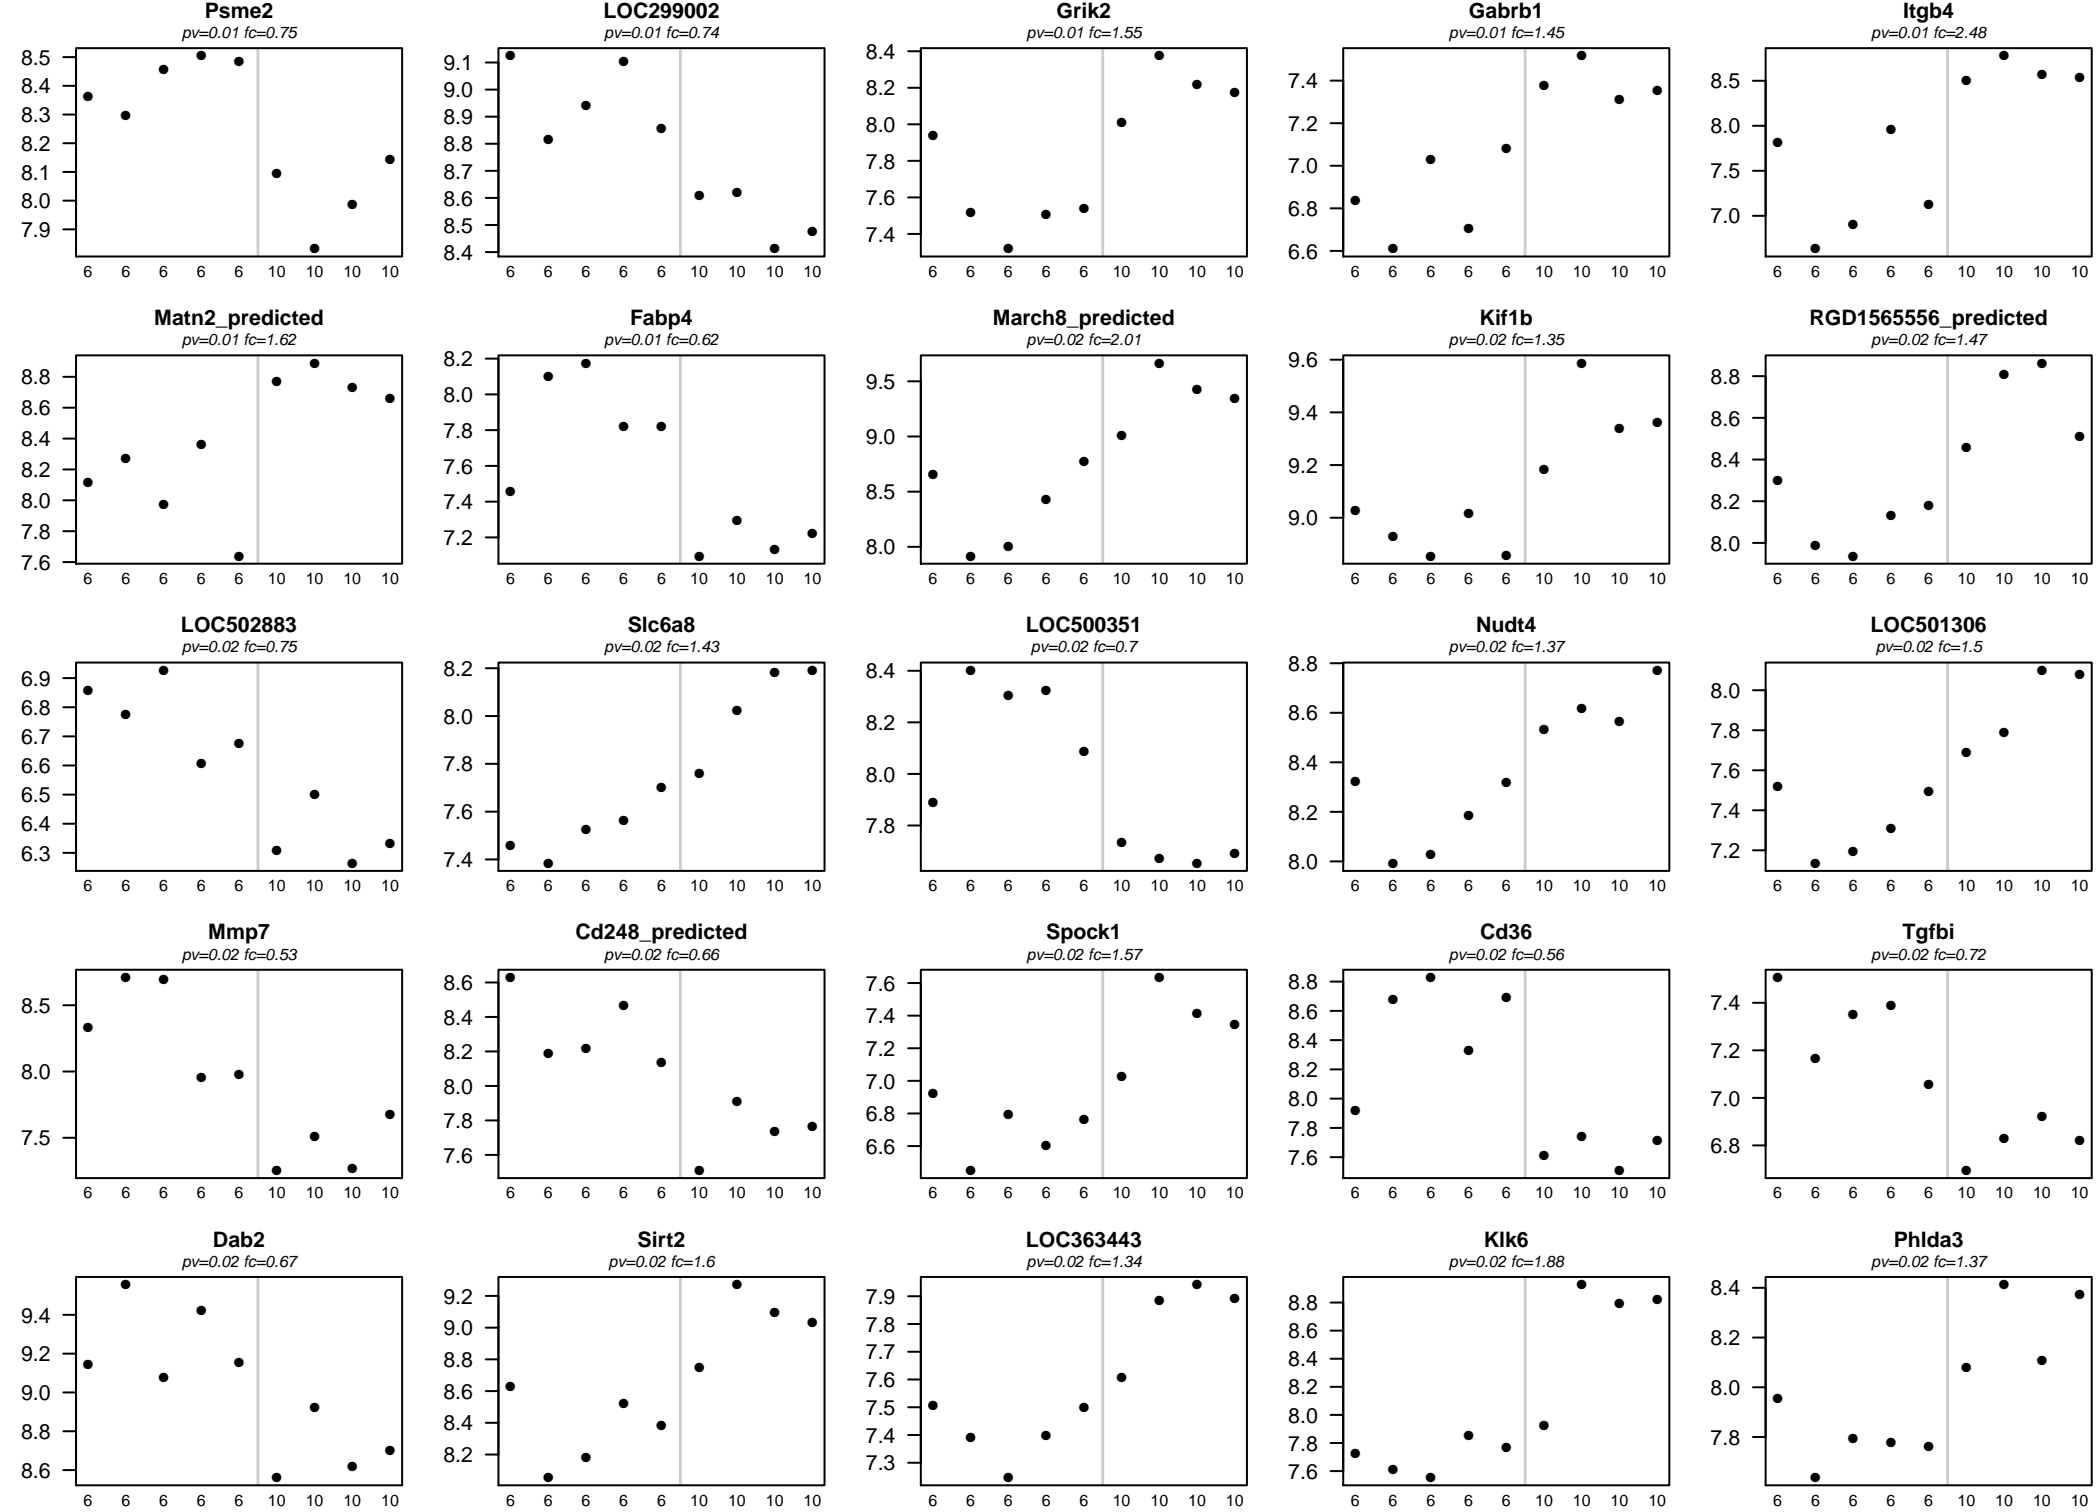

**Ddr1***pv=0.02 fc=1.36*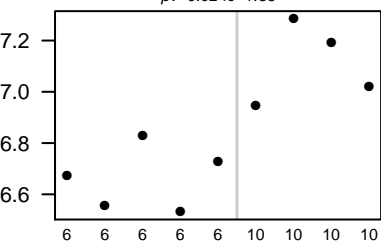**Prcp\_predicted***pv=0.02 fc=0.68*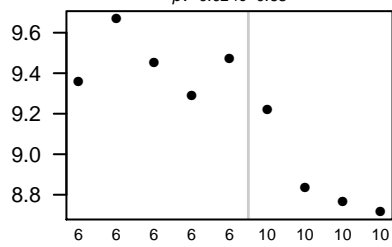**Apbb1***pv=0.02 fc=1.53*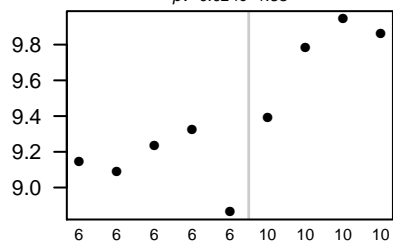**Hmgcs1***pv=0.02 fc=1.41*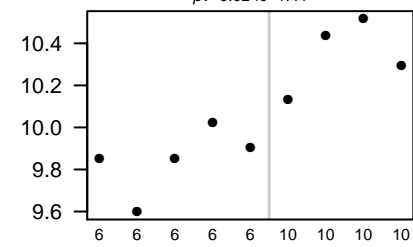**Sc5dl***pv=0.02 fc=1.44*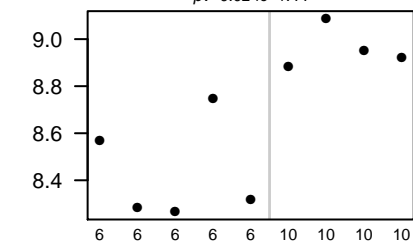**Mgll***pv=0.02 fc=0.75*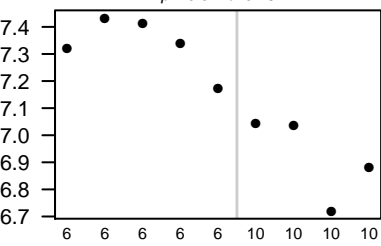**Serinc3***pv=0.02 fc=1.44*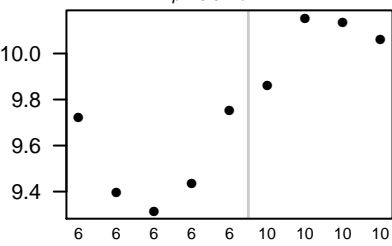**Stk17b***pv=0.02 fc=0.75*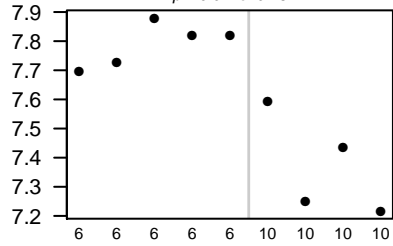**Ifi204***pv=0.02 fc=0.71*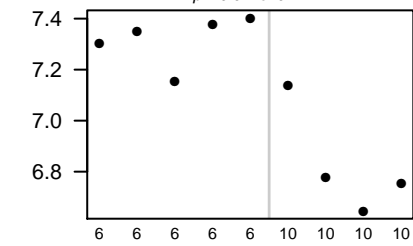**Gpr37***pv=0.02 fc=1.44*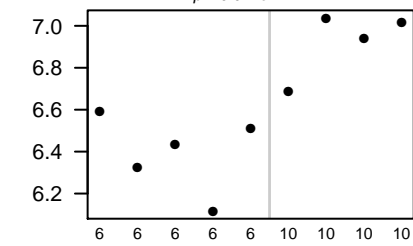**LOC685988***pv=0.02 fc=1.53*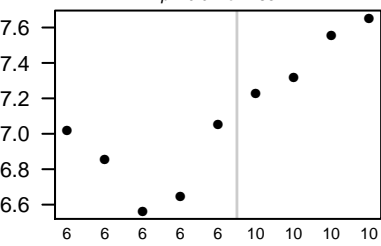**Edn1***pv=0.02 fc=0.67*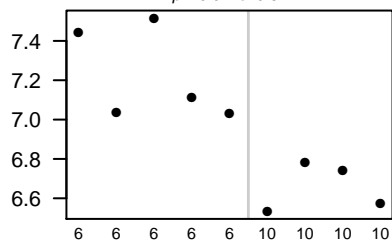**RGD1561543\_predicted***pv=0.02 fc=0.72*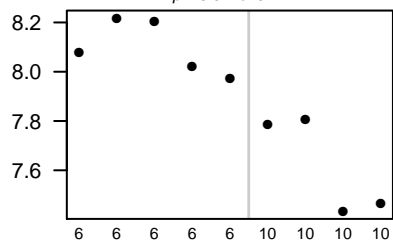**RGD1306212\_predicted***pv=0.02 fc=1.5*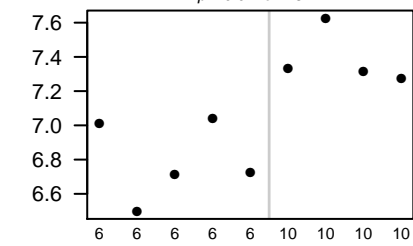**Apobec1***pv=0.02 fc=0.71*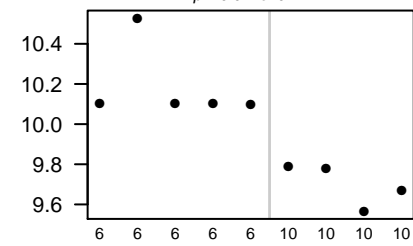**Incenp\_predicted***pv=0.02 fc=0.69*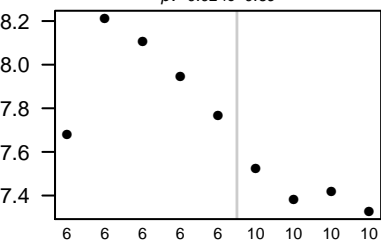**Ugcgl1***pv=0.02 fc=0.75*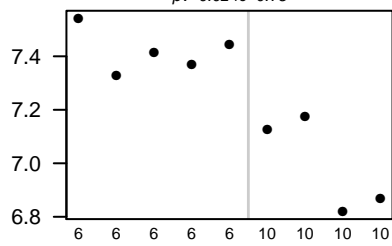**Ppfibp1\_predicted***pv=0.02 fc=0.72*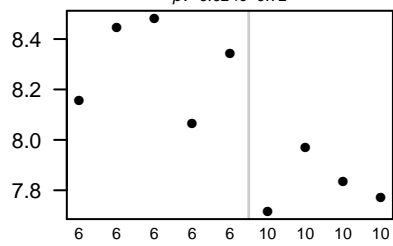**Daam2\_predicted***pv=0.02 fc=1.37*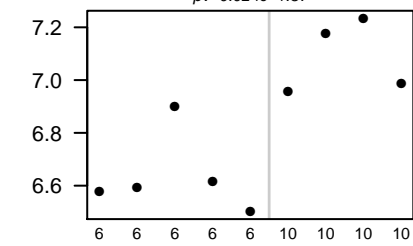**Rxrg***pv=0.02 fc=2.08*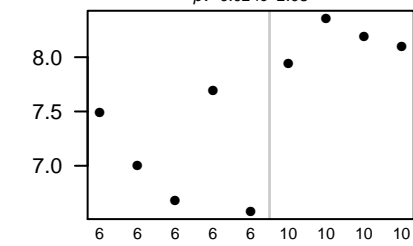**Igfbp5***pv=0.02 fc=1.37*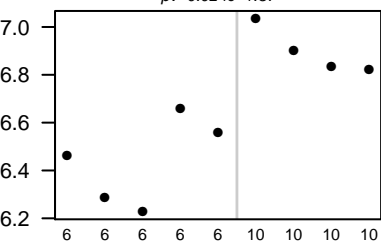**LOC367448***pv=0.02 fc=1.56*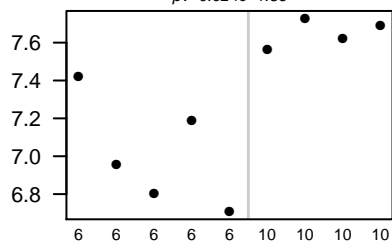**Ccl6***pv=0.02 fc=0.7*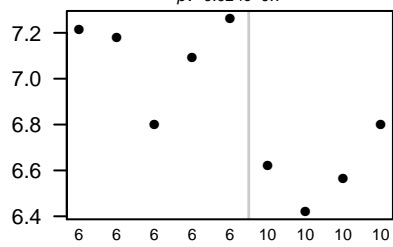**S100a11***pv=0.02 fc=0.68*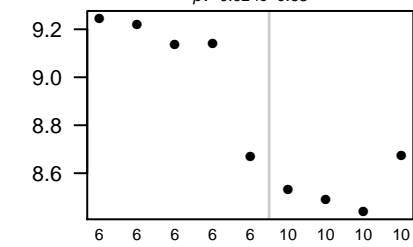**Casp14\_predicted***pv=0.02 fc=1.47*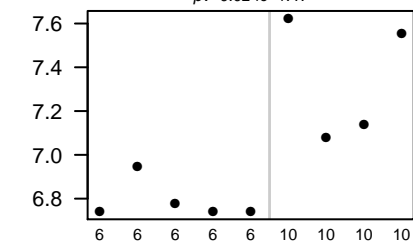

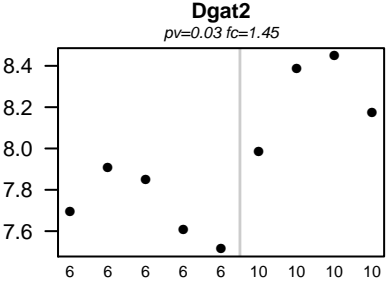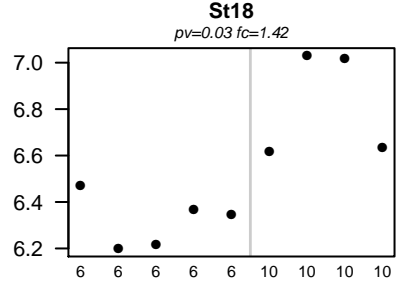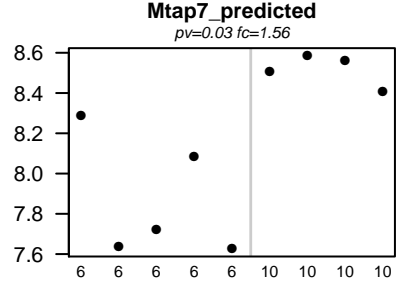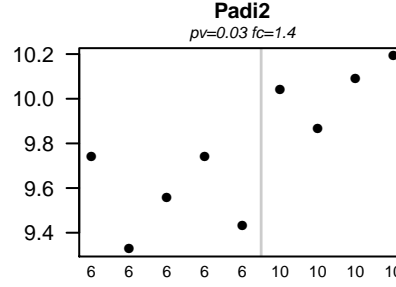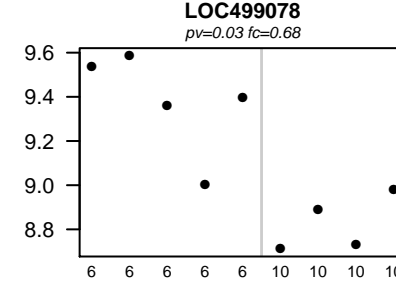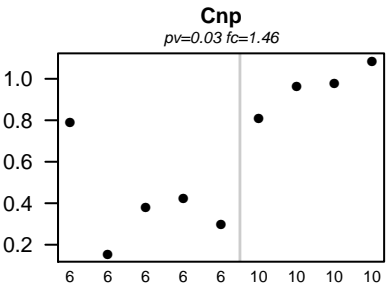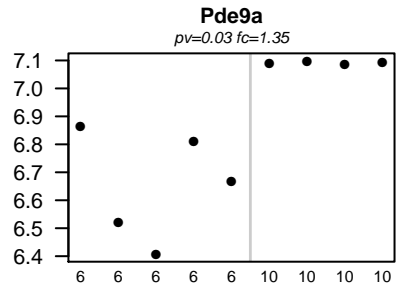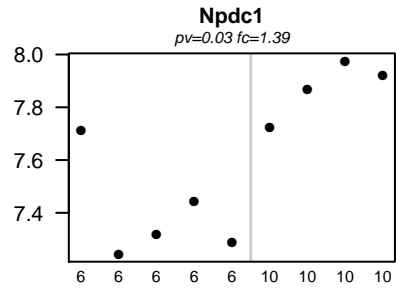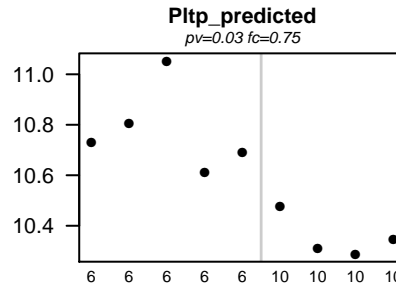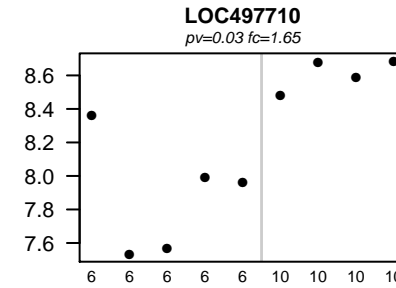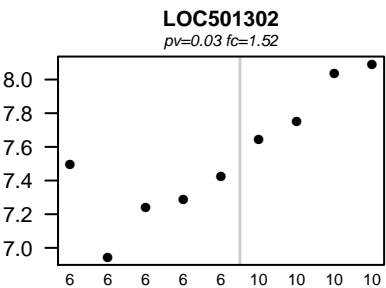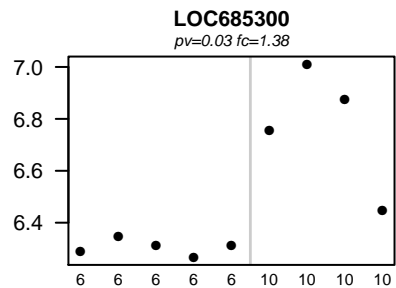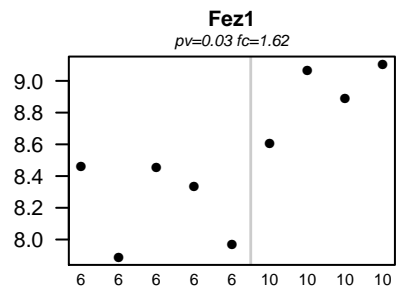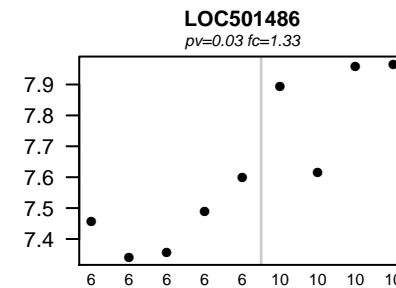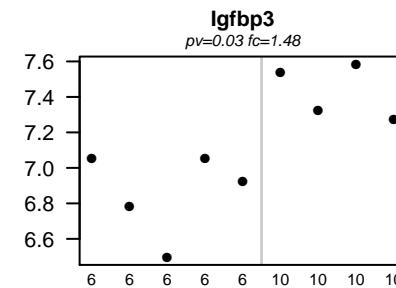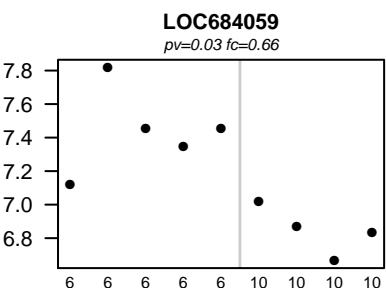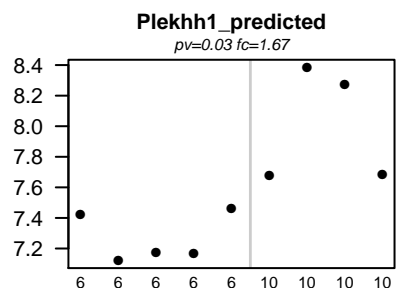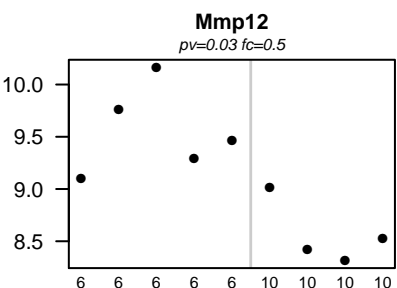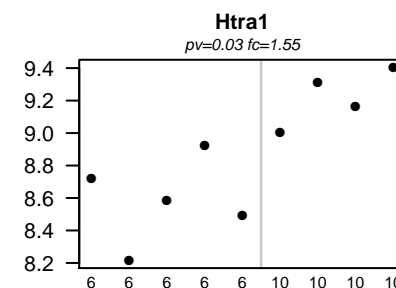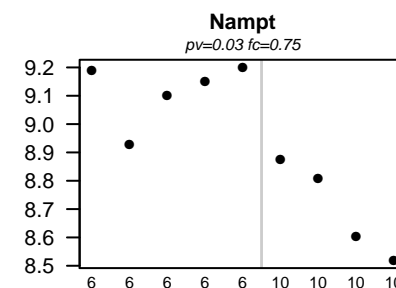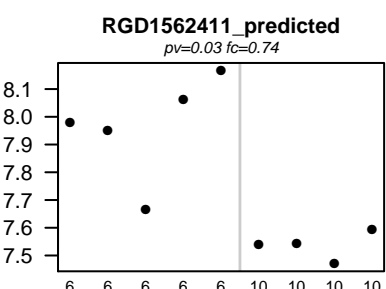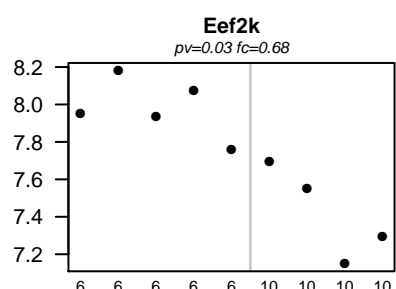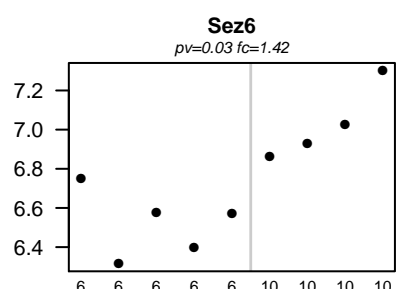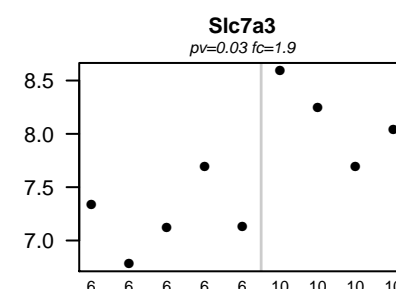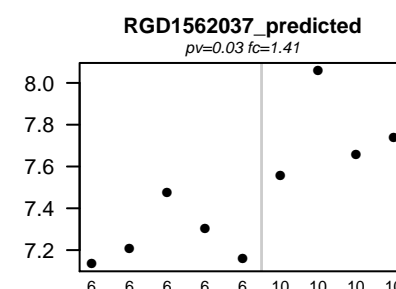

**Cyb5r2***pv=0.03 fc=1.55*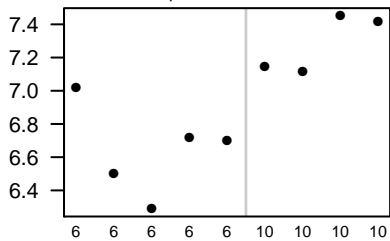**LOC362068***pv=0.03 fc=1.37*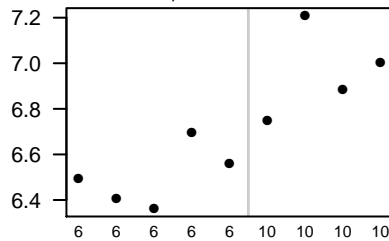**LOC499613***pv=0.03 fc=1.39*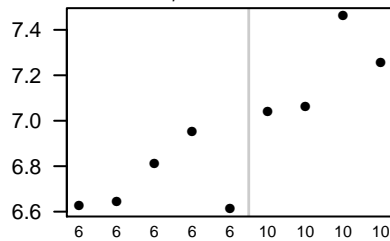**Phipp***pv=0.03 fc=1.42*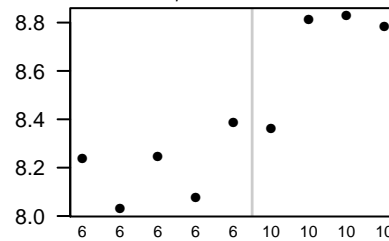**LOC501343***pv=0.03 fc=1.37*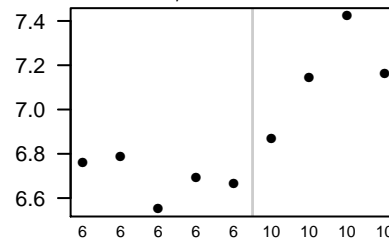**Clu***pv=0.03 fc=1.7*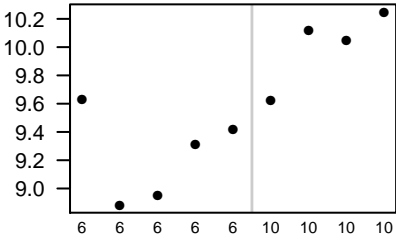**Ccna2***pv=0.03 fc=0.75*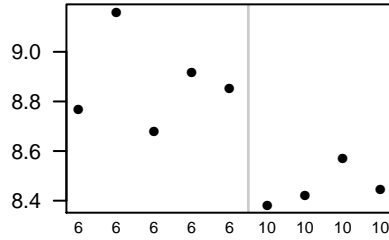**LOC502955***pv=0.03 fc=1.5*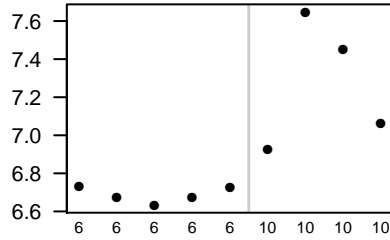**LOC501211***pv=0.03 fc=0.75*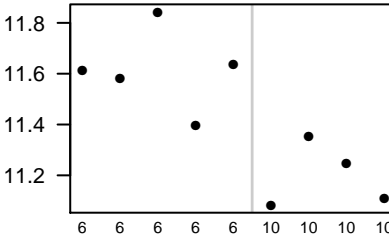**Sulf1***pv=0.03 fc=1.35*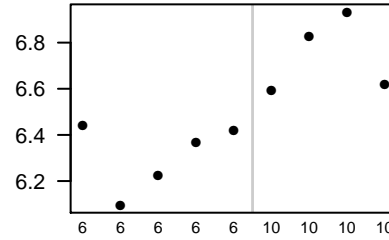**Mpdz***pv=0.03 fc=1.37*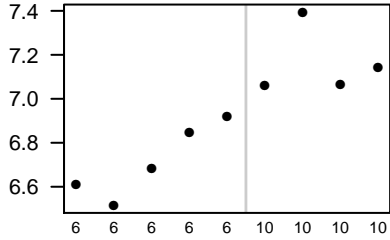**Elovl7\_predicted***pv=0.04 fc=1.46*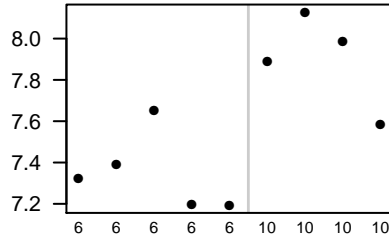**Snx15***pv=0.04 fc=1.39*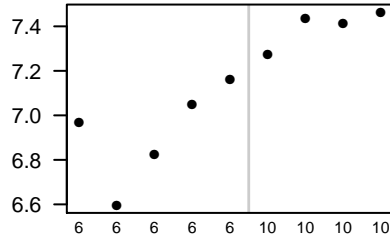**St6galnac3***pv=0.04 fc=1.51*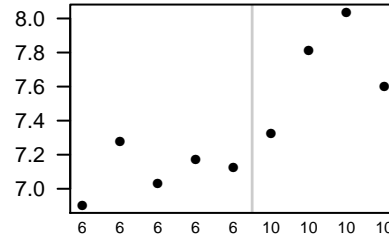**Igsf11***pv=0.04 fc=1.49*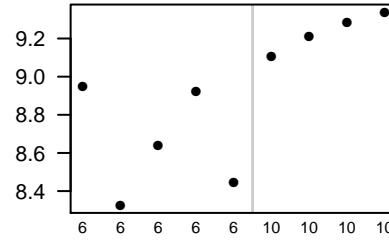**Gas7***pv=0.04 fc=1.67*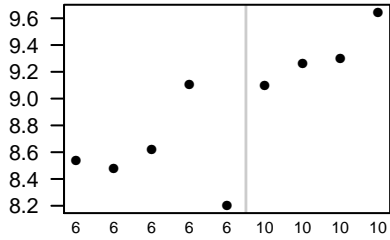**Enpep***pv=0.04 fc=1.45*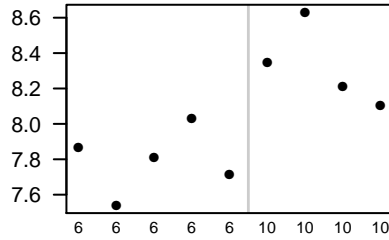**Rapgef3***pv=0.04 fc=1.35*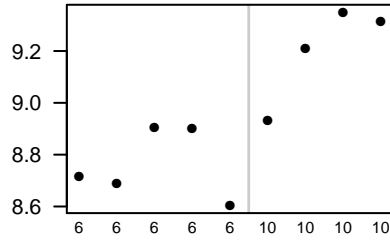**Mettl7a***pv=0.04 fc=1.39*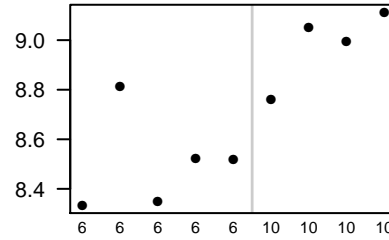**Spbc24\_predicted***pv=0.04 fc=0.72*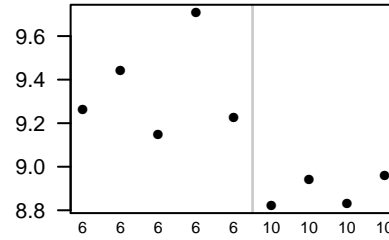**Gpx3***pv=0.04 fc=0.74*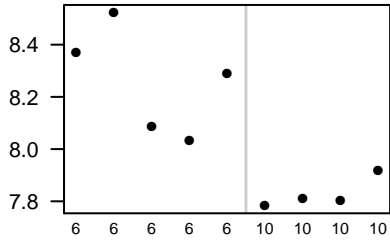**Hspa2***pv=0.04 fc=1.38*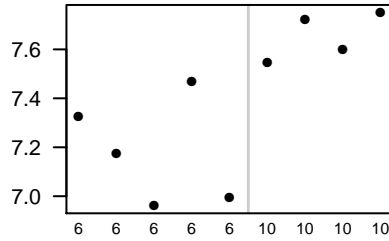**Npy***pv=0.04 fc=1.44*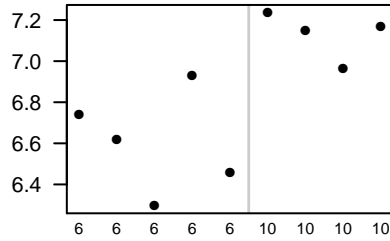**Stab1\_predicted***pv=0.04 fc=0.75*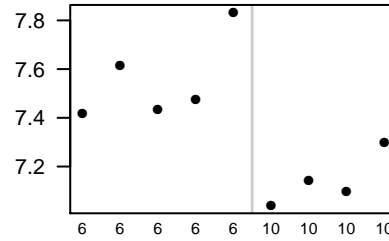**Cd24***pv=0.04 fc=1.63*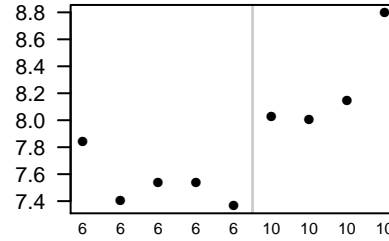

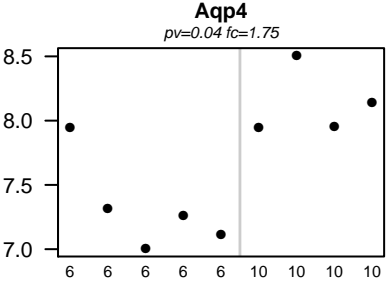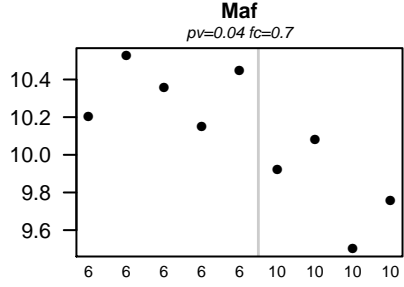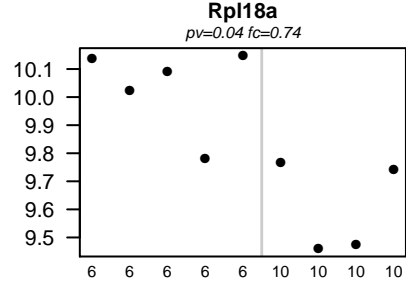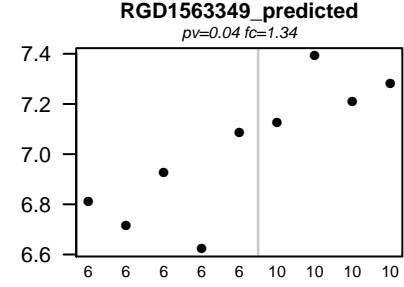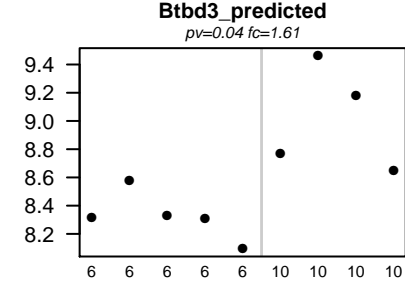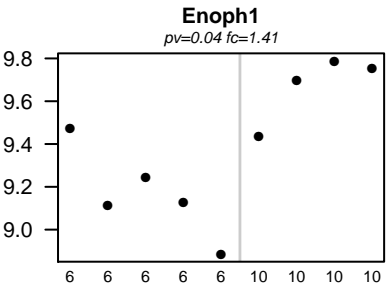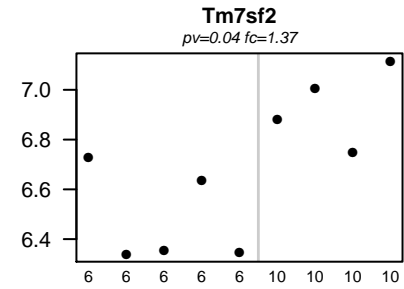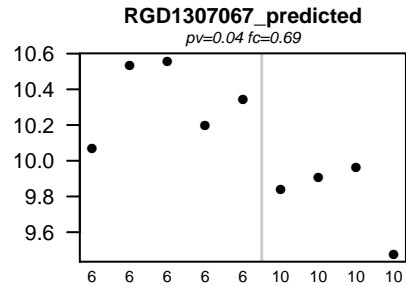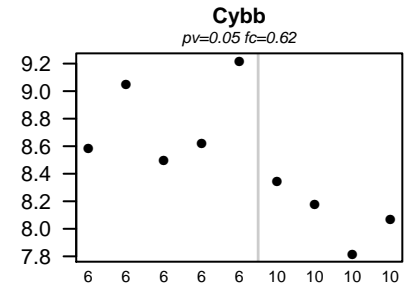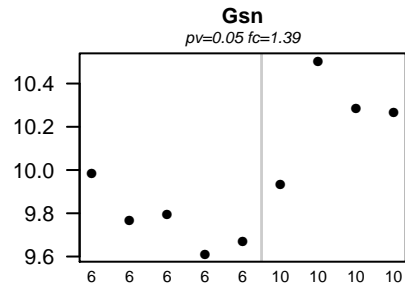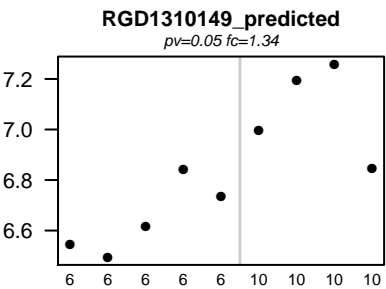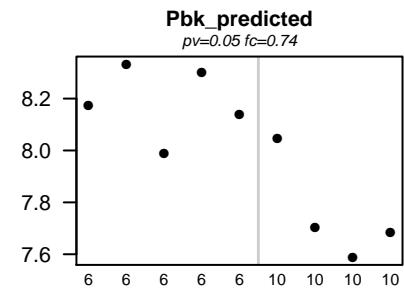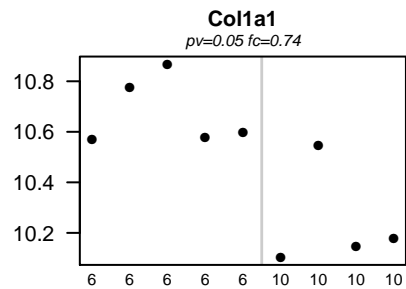

Supplement: elife-30325-fig2-data1.pdf [file elife-30325-fig2-data1.pdf]
