# Supplementary material for: Injury-induced perivascular niche supports alternative differentiation of adult rodent CNS progenitor cells
Source: PubMed Central journal article supplement (PMC6141235; doi:10.7554/elife.30325), 2018-09-17

**LOC360443***pv=0 fc=4.66*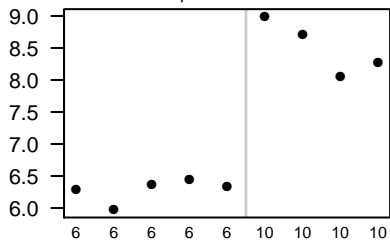**Tspan2***pv=0 fc=5.14*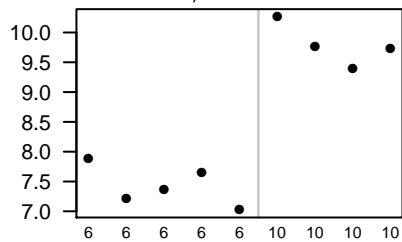**Lpar1***pv=0 fc=2.89*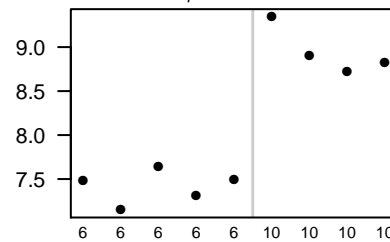**Mog***pv=0 fc=3.62*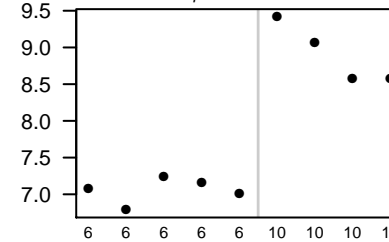**Htra1***pv=0 fc=2.08*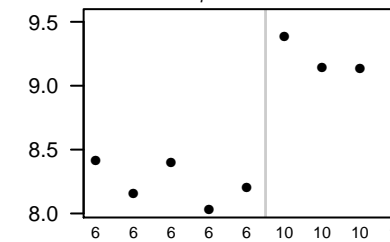**LOC680682***pv=0 fc=1.82*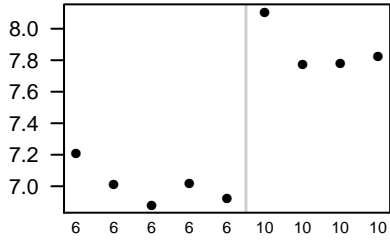**Scn7a***pv=0 fc=1.8*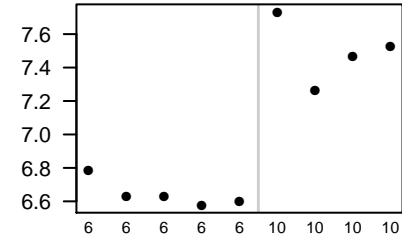**LOC501479***pv=0 fc=2.16*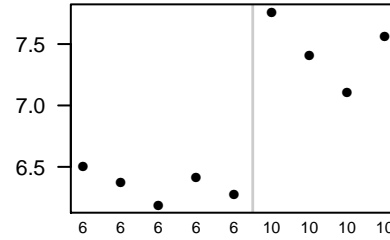**Mid2\_predicted***pv=0.01 fc=1.59*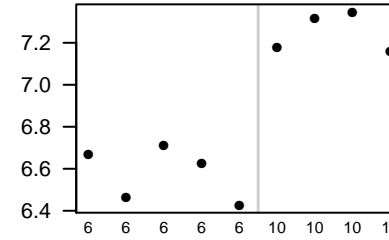**Mbp***pv=0.01 fc=2.99*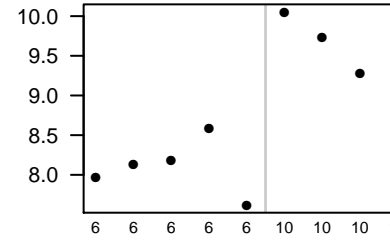**Opalin***pv=0.01 fc=2.61*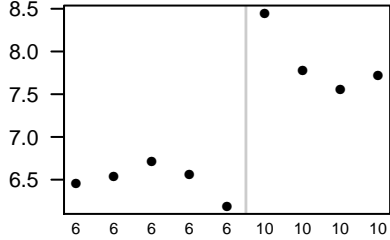**RGD1561090\_predicted***pv=0.01 fc=4.08*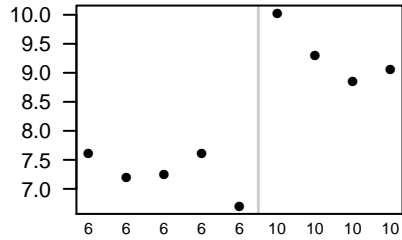**Sema6d\_predicted***pv=0.01 fc=2.6*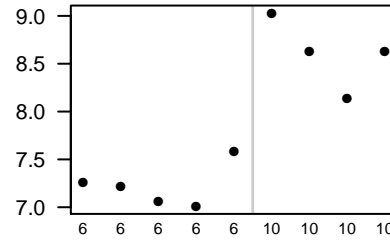**Sept4***pv=0.01 fc=3.4*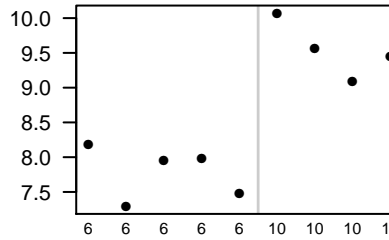**Rras2***pv=0.01 fc=2.14*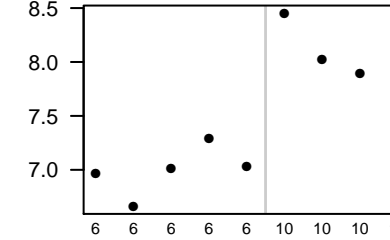**Sema6a\_predicted***pv=0.01 fc=2.38*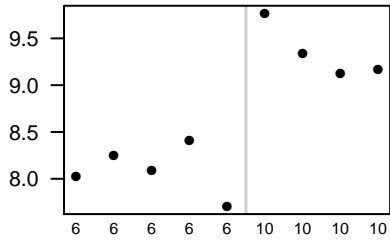**LOC501478***pv=0.01 fc=1.83*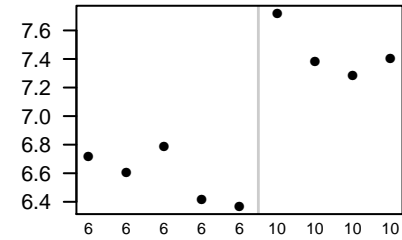**LOC689290***pv=0.01 fc=2.25*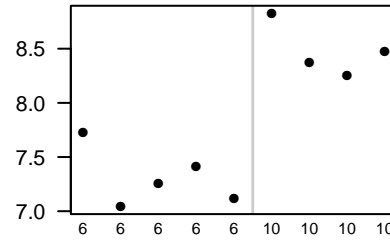**Tmem98***pv=0.01 fc=1.75*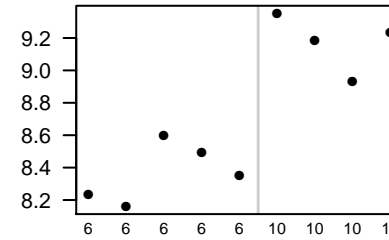**Dhh***pv=0.01 fc=2.92*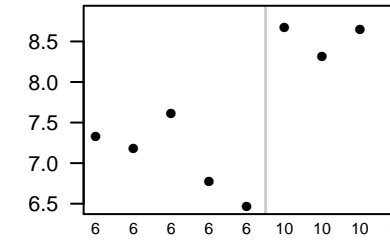**Fxyd1***pv=0.01 fc=1.52*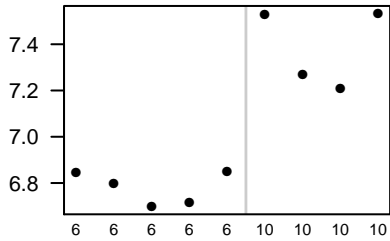**Mpz***pv=0.01 fc=2.04*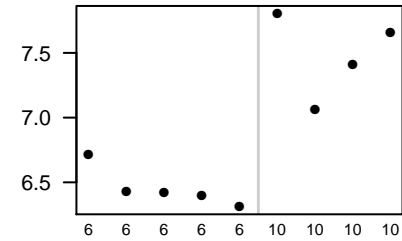**Dpysl4***pv=0.01 fc=1.65*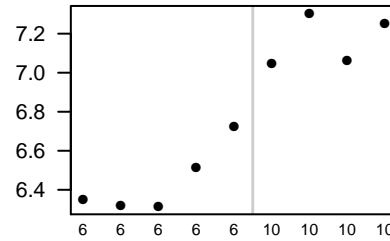**Ceacam10***pv=0.01 fc=4.5*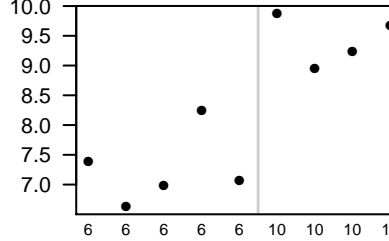**Sh3gl3***pv=0.02 fc=2.27*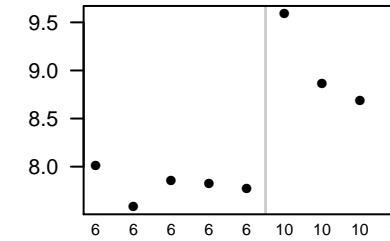

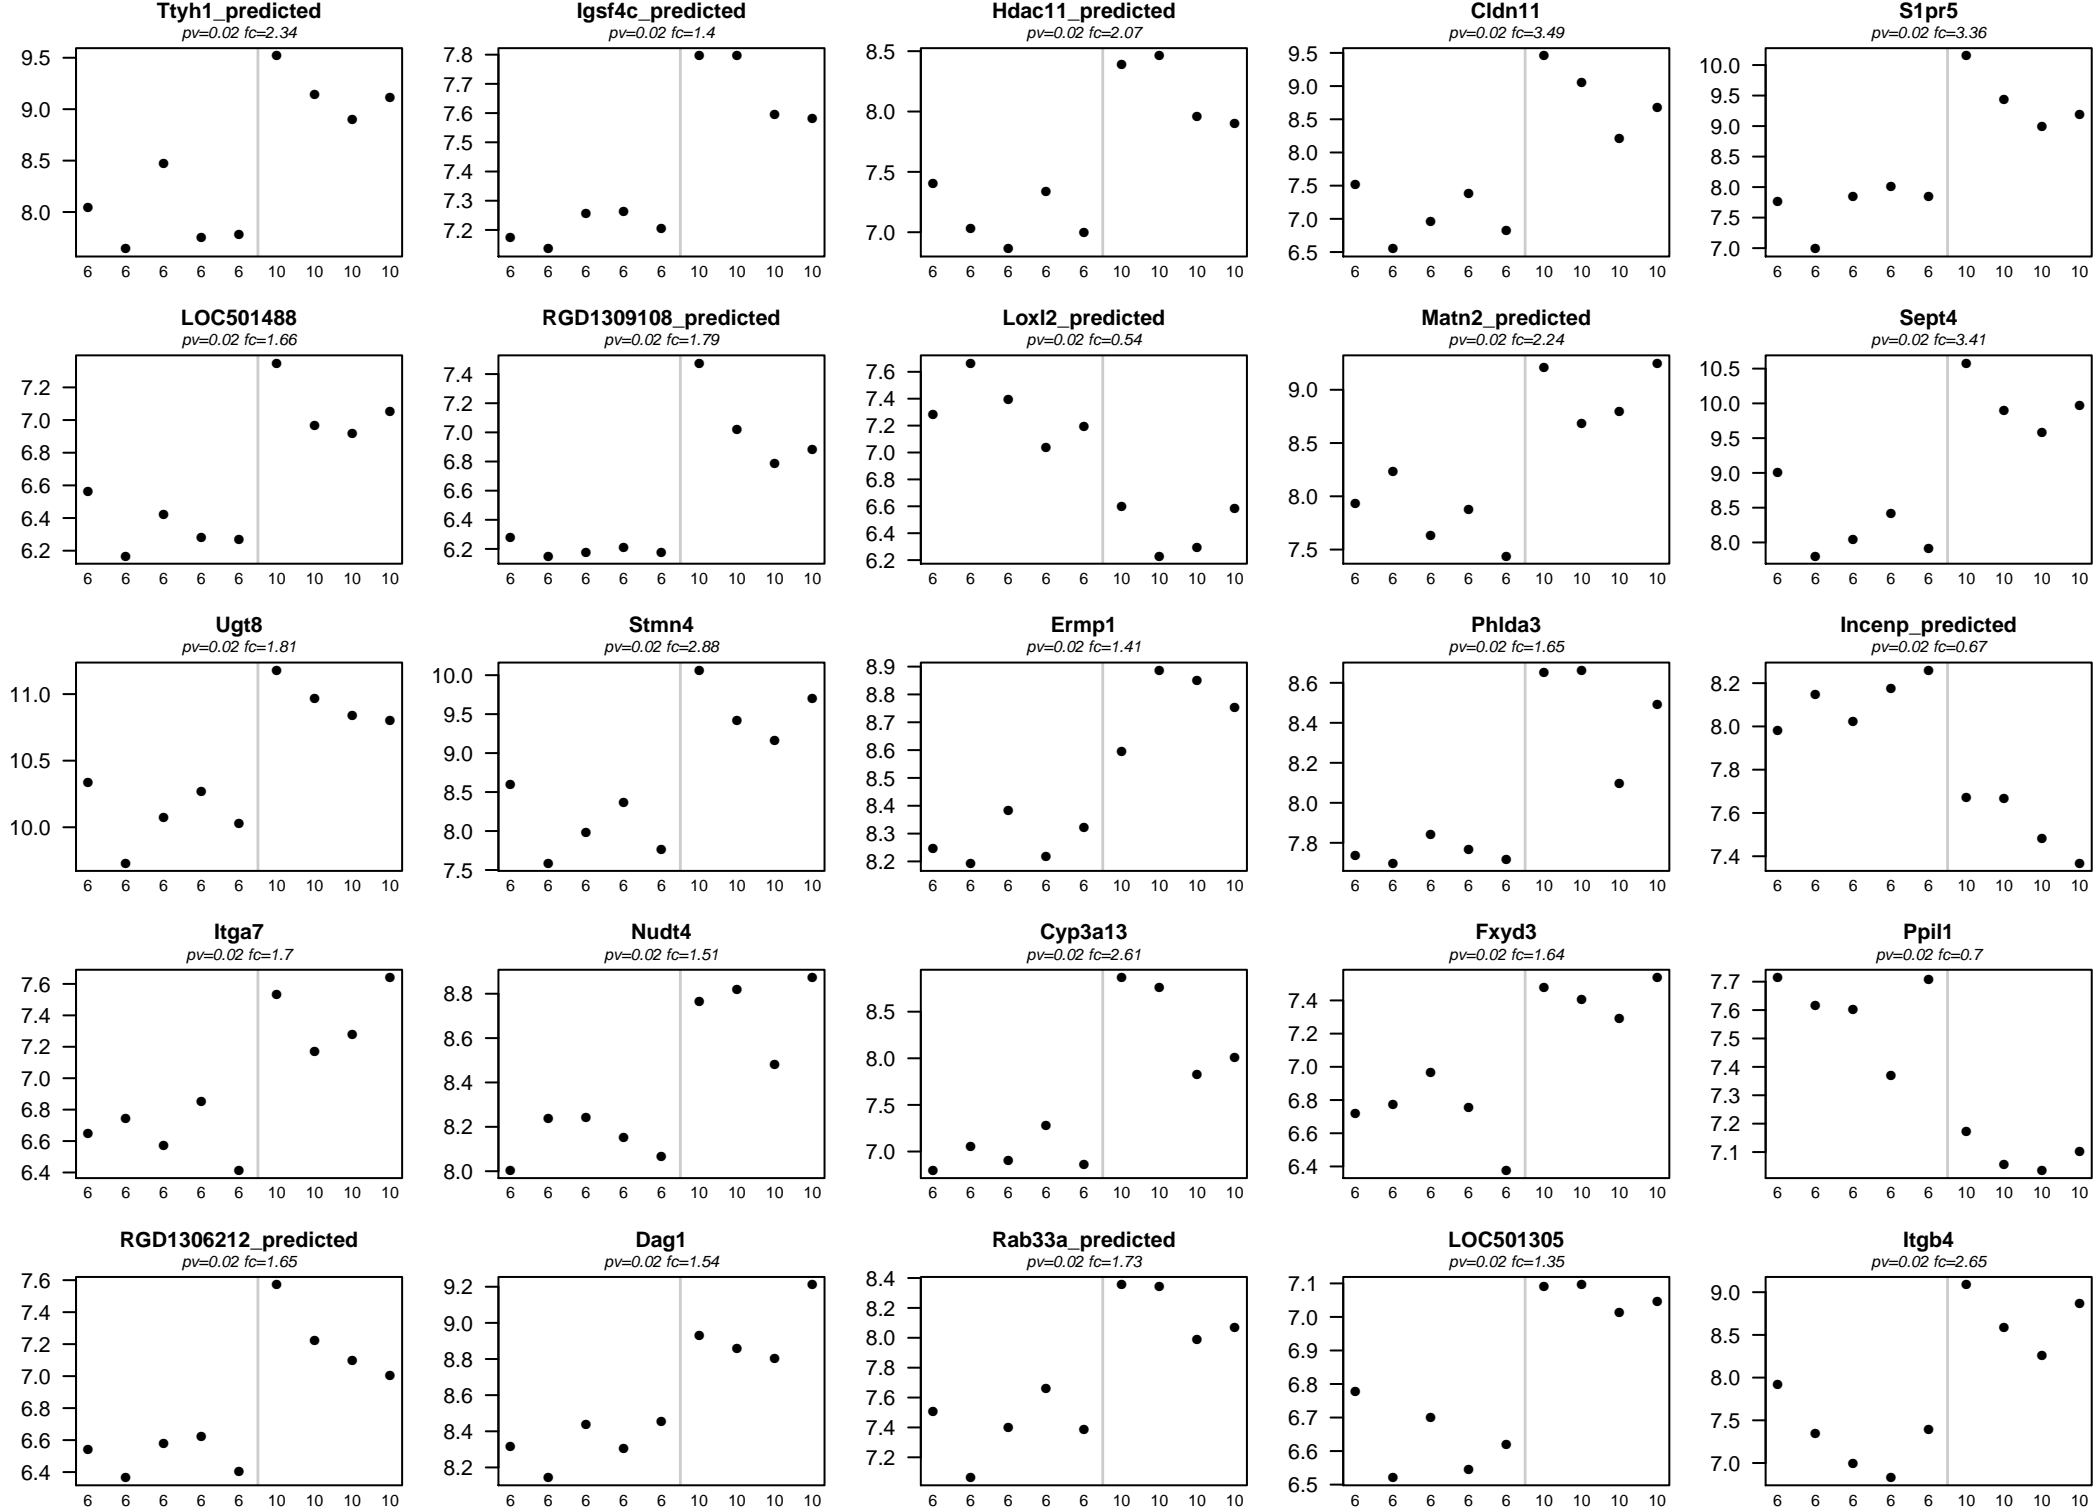

**Pcdh17\_predicted***pv=0.02 fc=1.61*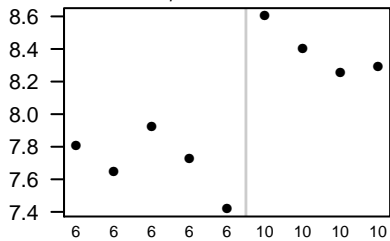**RGD1310680\_predicted***pv=0.02 fc=1.67*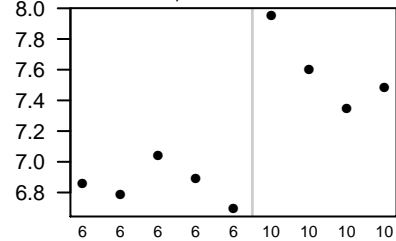**Lgi4***pv=0.02 fc=1.98*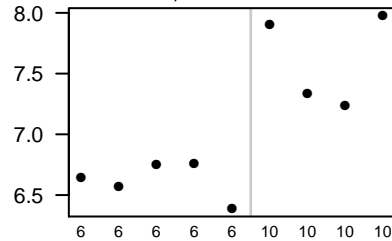**Trim36\_predicted***pv=0.02 fc=2.18*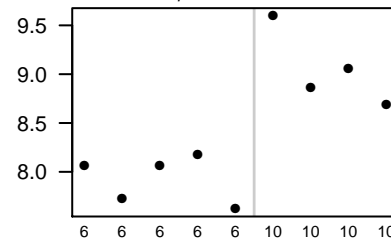**Entpd2***pv=0.02 fc=2.25*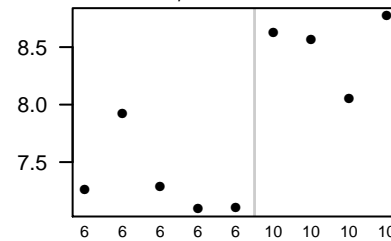**LOC500652***pv=0.02 fc=2.02*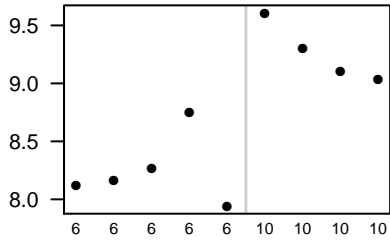**Arfp1***pv=0.02 fc=0.7*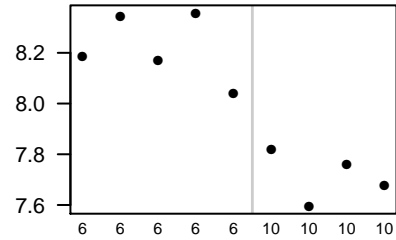**Spock1***pv=0.02 fc=1.41*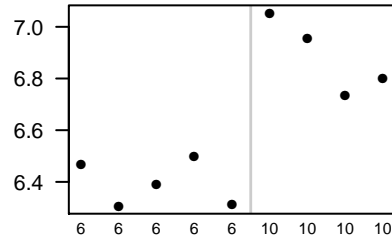**RGD1562608\_predicted***pv=0.02 fc=0.73*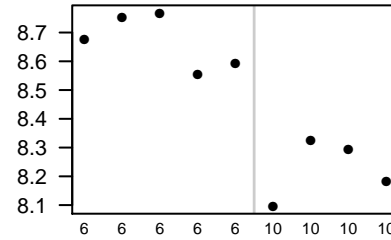**LOC689541***pv=0.02 fc=1.49*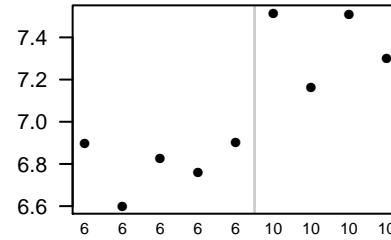**Prkcz***pv=0.03 fc=1.94*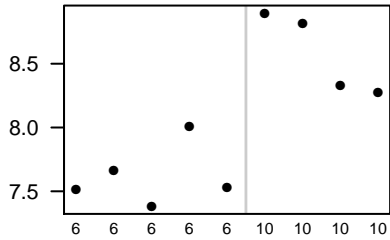**Sirt2***pv=0.03 fc=1.71*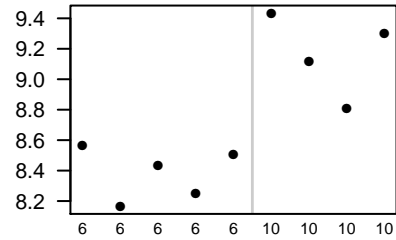**RGD735065***pv=0.03 fc=1.39*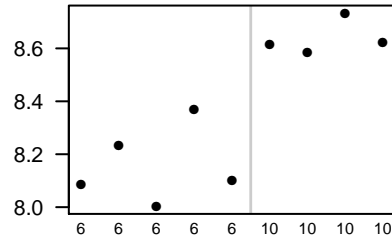**Centd1\_predicted***pv=0.03 fc=2.06*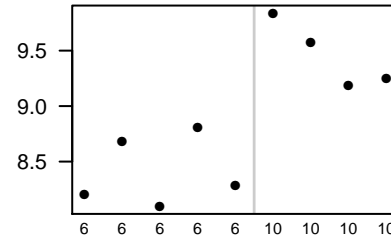**Jam3***pv=0.03 fc=1.61*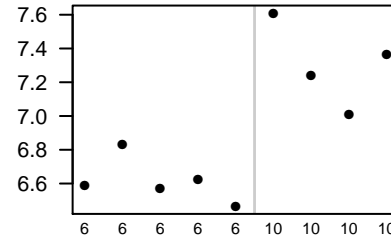**Dhcr24***pv=0.03 fc=1.89*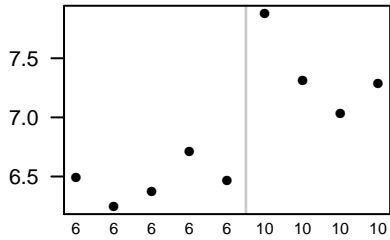**Ddx18***pv=0.03 fc=0.71*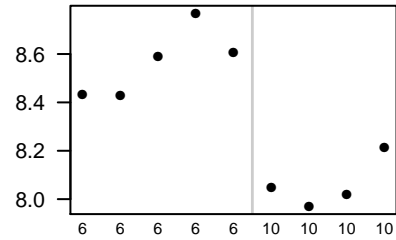**Chn2***pv=0.03 fc=1.49*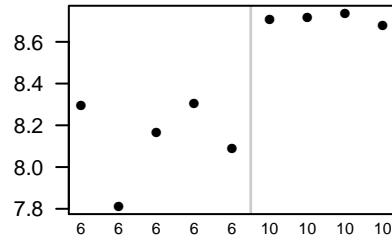**LOC501479***pv=0.03 fc=1.52*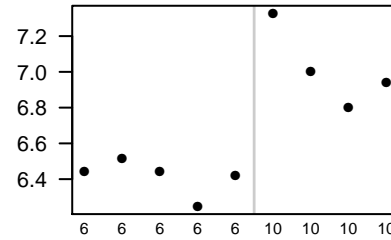**Kif11***pv=0.03 fc=0.62*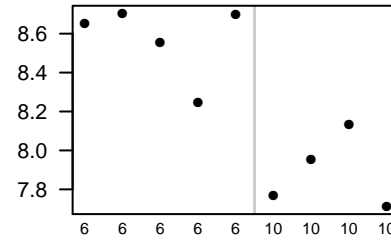**RGD1563633\_predicted***pv=0.03 fc=0.63*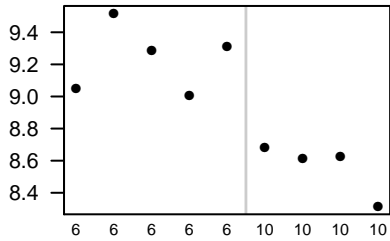**Nupr1***pv=0.03 fc=1.55*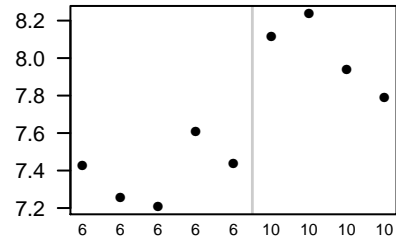**Plp1***pv=0.03 fc=1.73*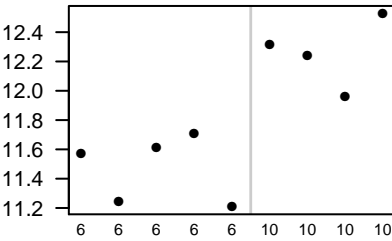**Npdc1***pv=0.03 fc=1.53*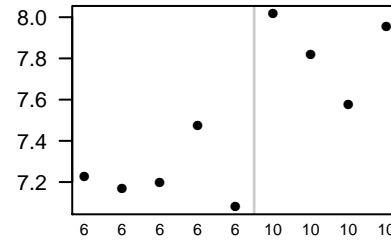**Plip***pv=0.03 fc=1.55*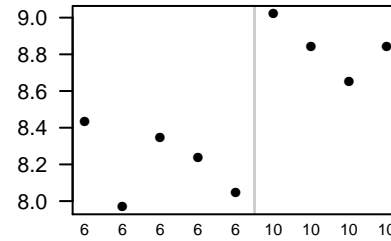

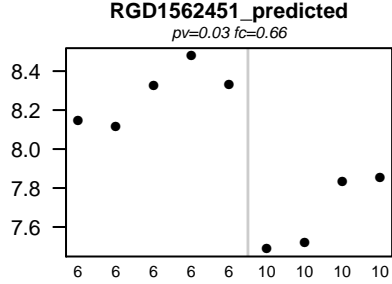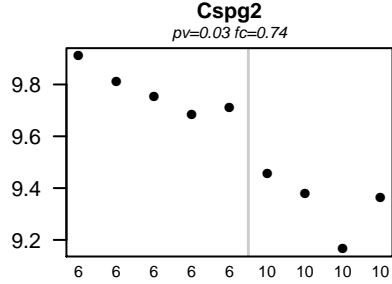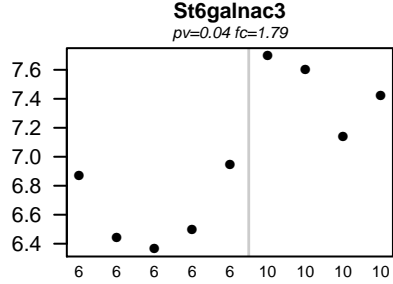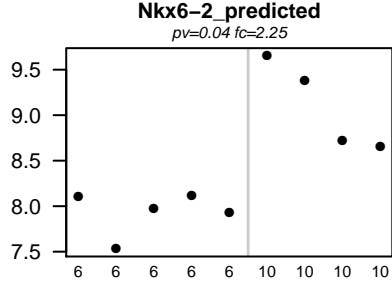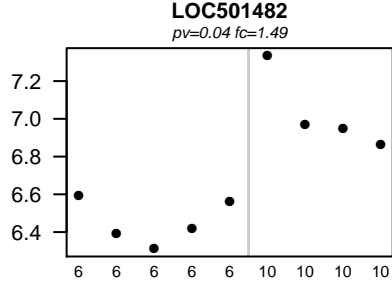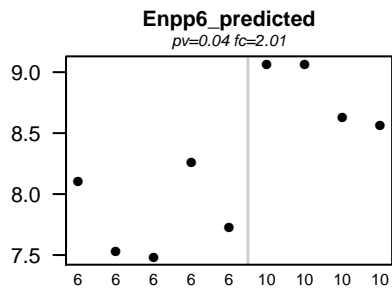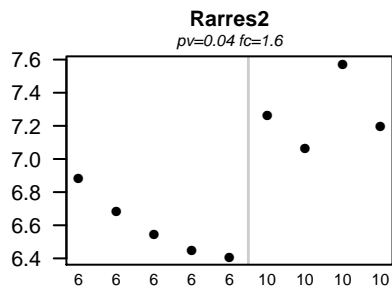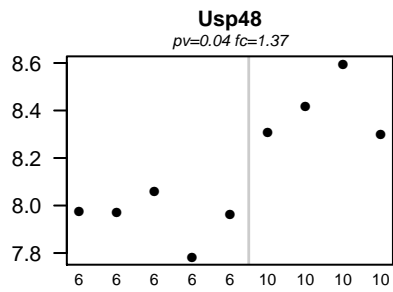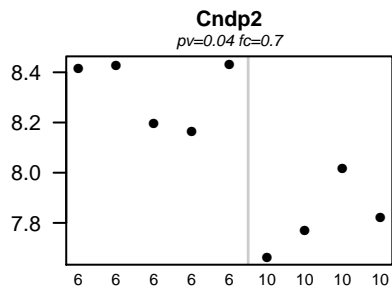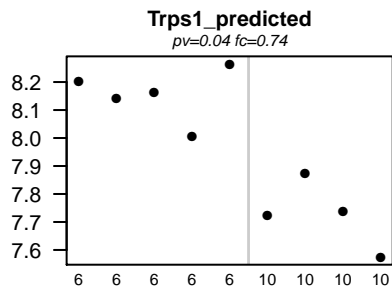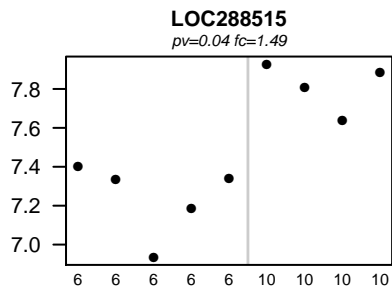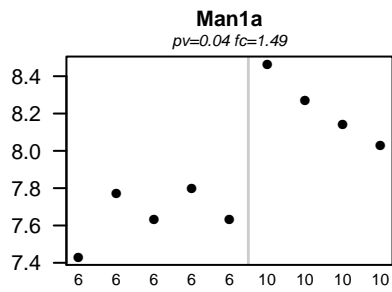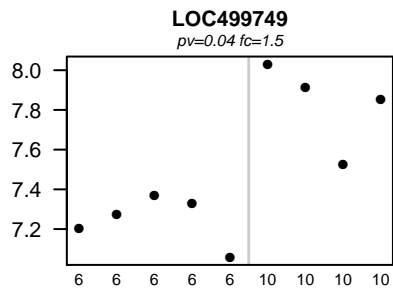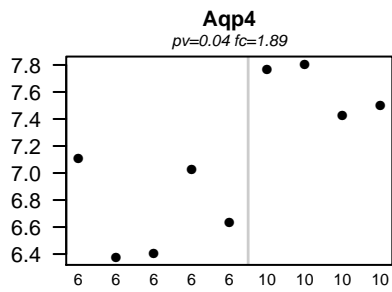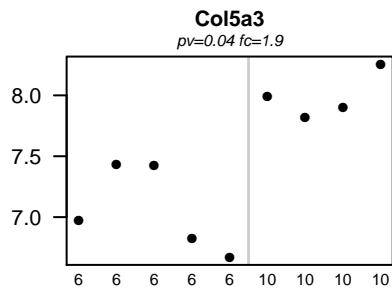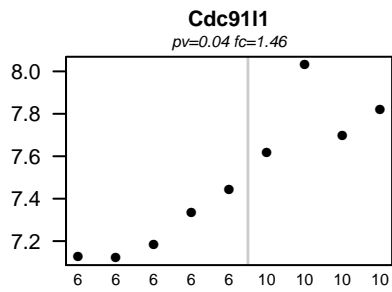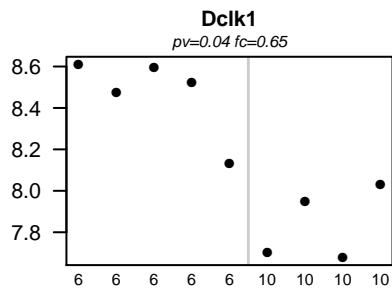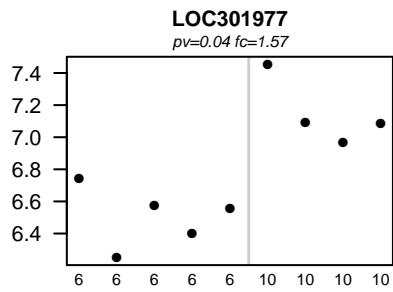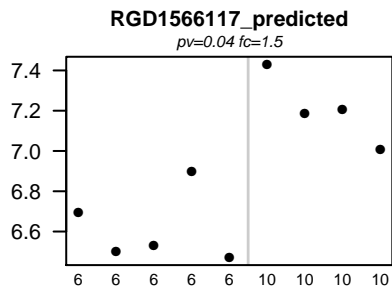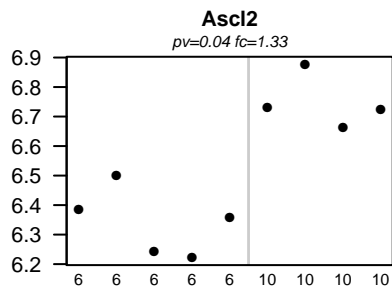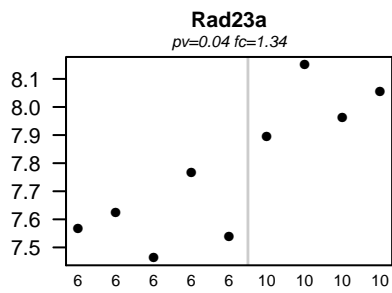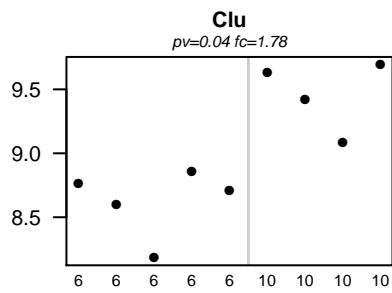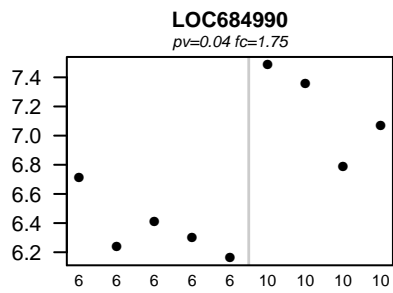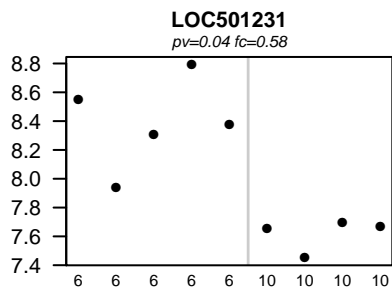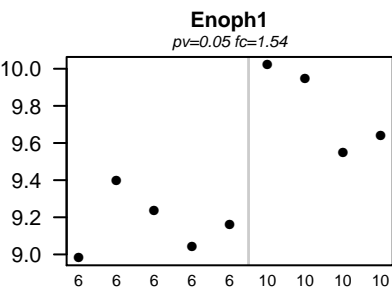

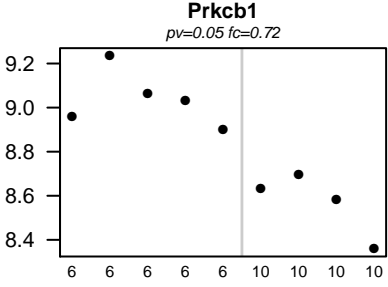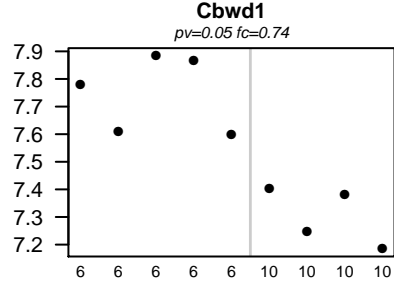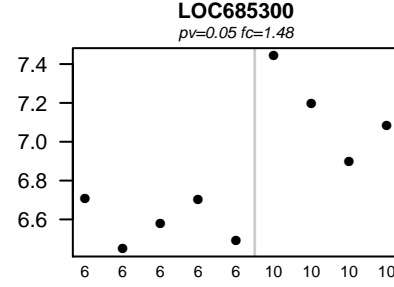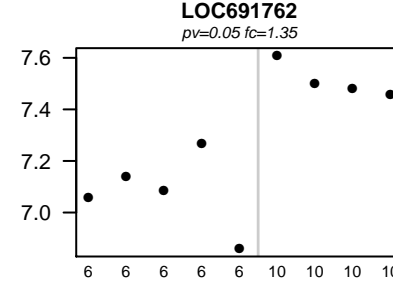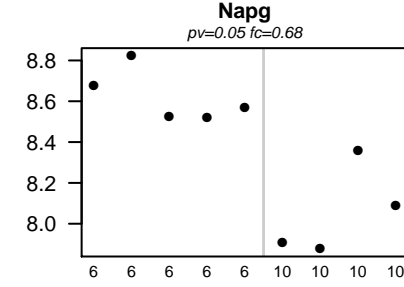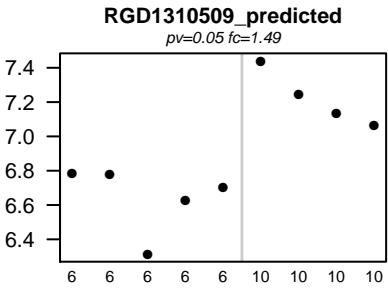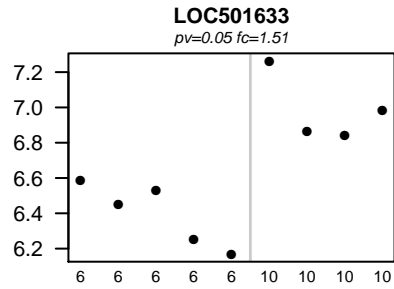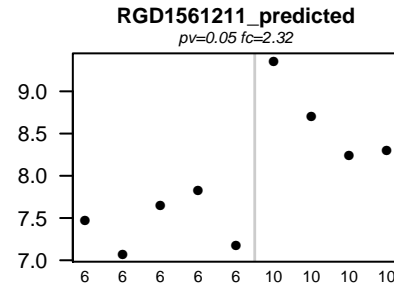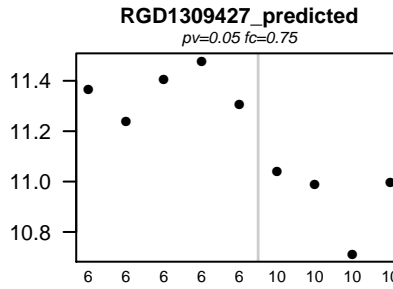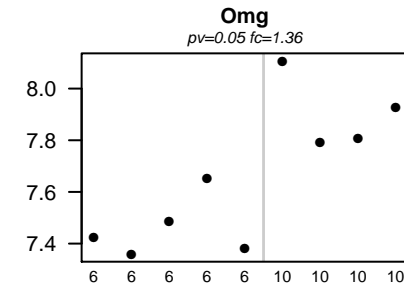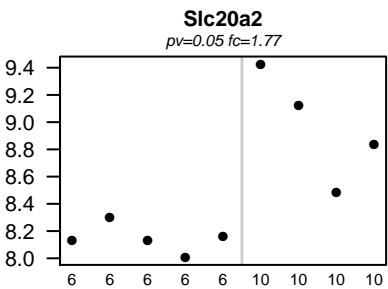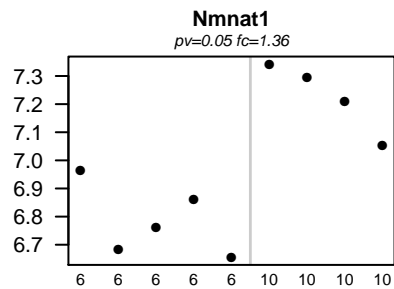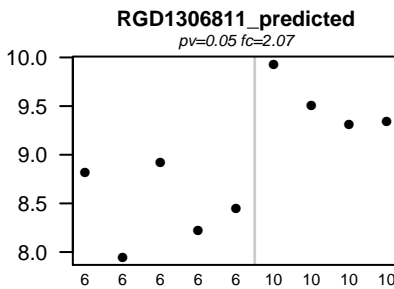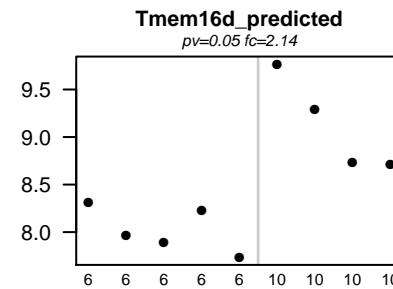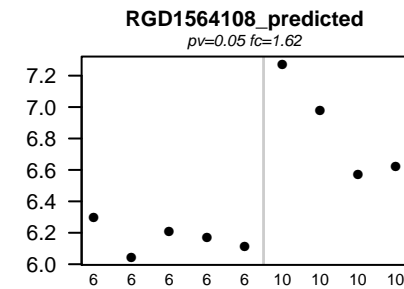

Supplement: elife-30325-fig2-data2.pdf [file elife-30325-fig2-data2.pdf]
