# Supplementary material for: Injury-induced perivascular niche supports alternative differentiation of adult rodent CNS progenitor cells
Source: PubMed Central journal article supplement (PMC6141235; doi:10.7554/elife.30325), 2018-09-17

Mid2\_predicted

adj.pv=0.0084, fc=1.59

VN6 VN10

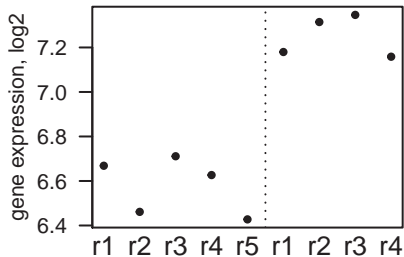

Tmem98

adj.pv=0.014, fc=1.75

VN6 VN10

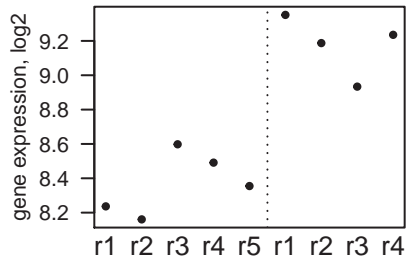

Fxyd1

adj.pv=0.014, fc=1.52

VN6 VN10

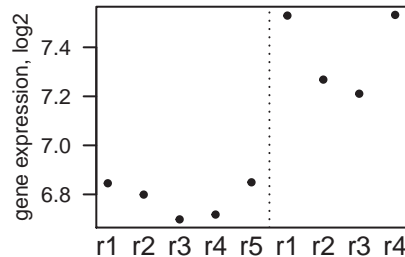

Igsf4c\_predicted

adj.pv=0.0151, fc=1.4

VN6 VN10

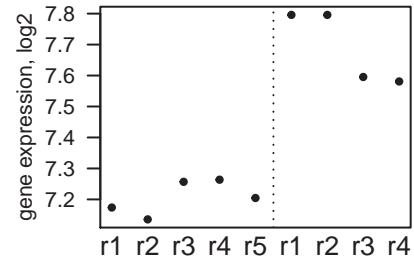

RGD1309108\_predicted

adj.pv=0.0156, fc=1.79

VN6 VN10

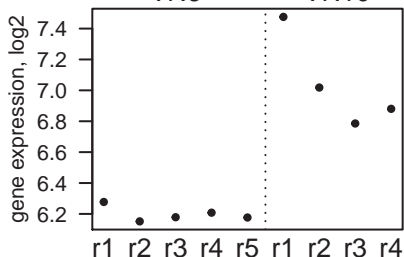

Loxl2\_predicted

adj.pv=0.0156, fc=0.54

VN6 VN10

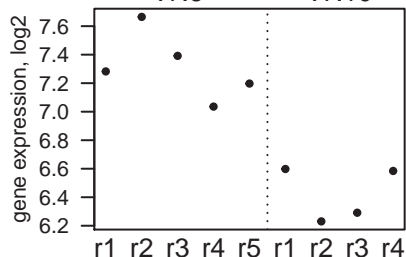

Aspm\_predicted

adj.pv=0.016, fc=0.77

VN6 VN10

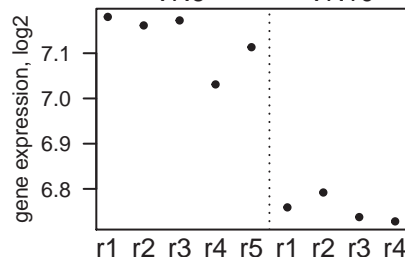

Ermp1

adj.pv=0.0172, fc=1.41

VN6 VN10

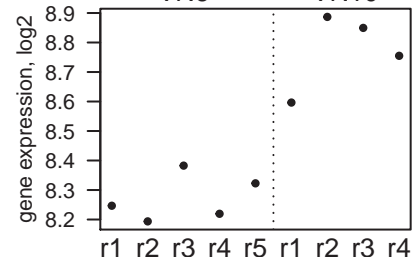

Rgs16

adj.pv=0.0175, fc=1.32

VN6 VN10

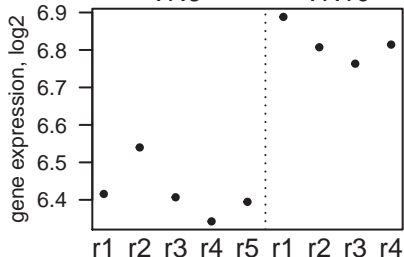

Ppil1

adj.pv=0.0194, fc=0.7

VN6 VN10

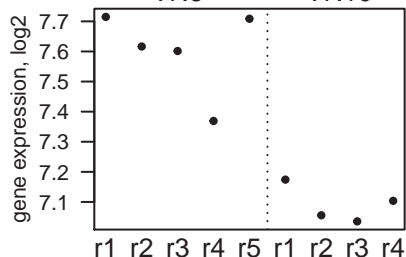

Dag1

adj.pv=0.0194, fc=1.54

VN6 VN10

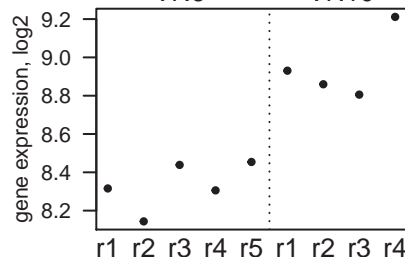

Rab33a\_predicted

adj.pv=0.02, fc=1.73

VN6 VN10

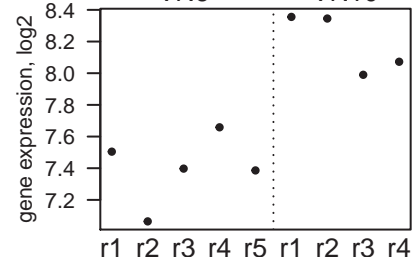

**RGD1310680\_predicted**

*adj.pv=0.0213, fc=1.67*

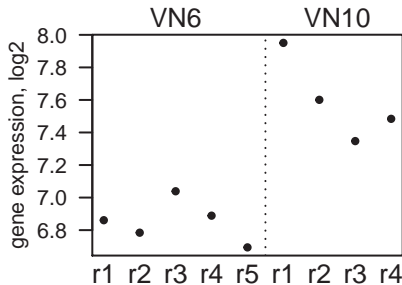

**Lgi4**

*adj.pv=0.0224, fc=1.98*

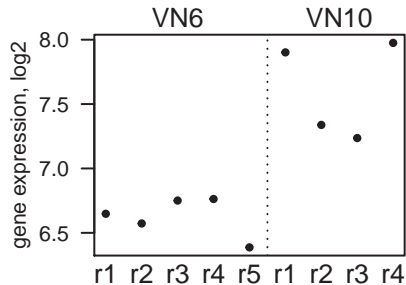

**Entpd2**

*adj.pv=0.0224, fc=2.25*

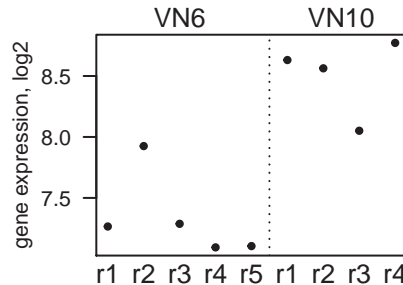

**Arfp1**

*adj.pv=0.0224, fc=0.7*

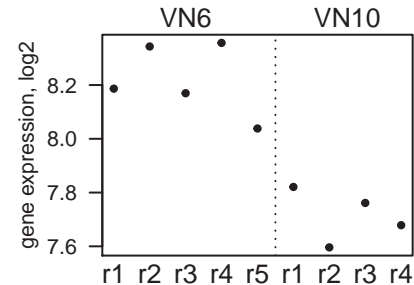

**RGD1562608\_predicted**

*adj.pv=0.024, fc=0.73*

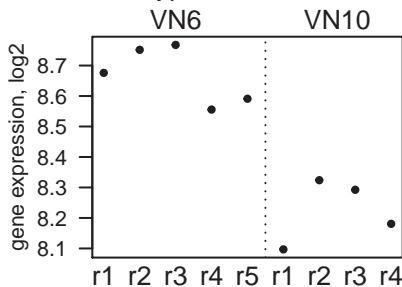

**RGD735065**

*adj.pv=0.0279, fc=1.39*

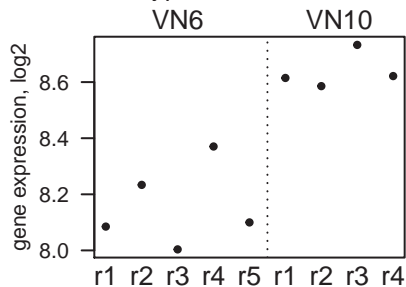

**Ddx18**

*adj.pv=0.0279, fc=0.71*

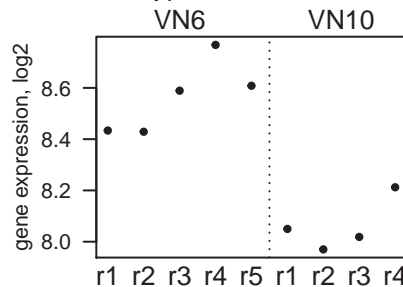

**Chn2**

*adj.pv=0.0279, fc=1.49*

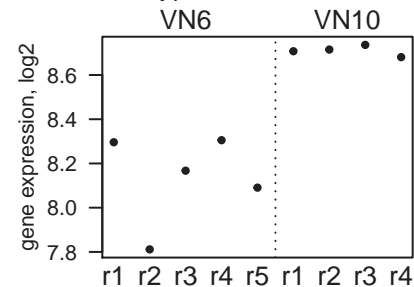

**LOC501479**

*adj.pv=0.0295, fc=1.52*

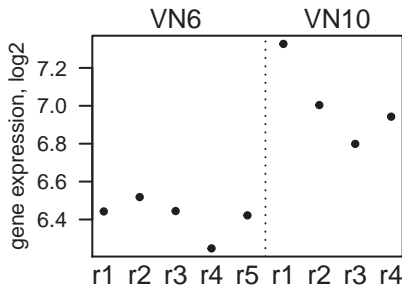

**RGD1563633\_predicted**

*adj.pv=0.0298, fc=0.63*

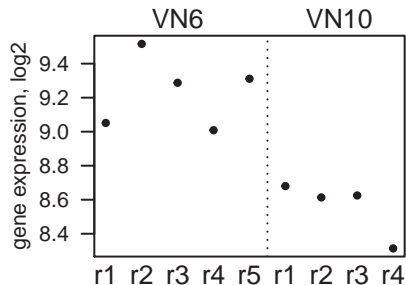

**RGD1562451\_predicted**

*adj.pv=0.0326, fc=0.66*

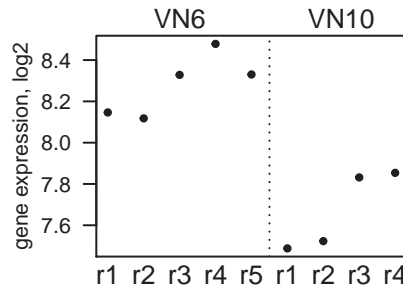

**LOC501482**

*adj.pv=0.0364, fc=1.49*

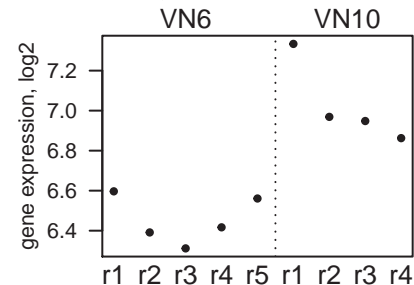

**Usp48***adj.pv=0.0364, fc=1.37*

VN6 VN10

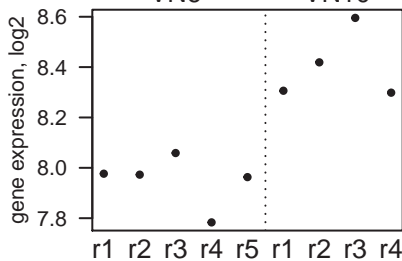**Cndp2***adj.pv=0.0364, fc=0.7*

VN6 VN10

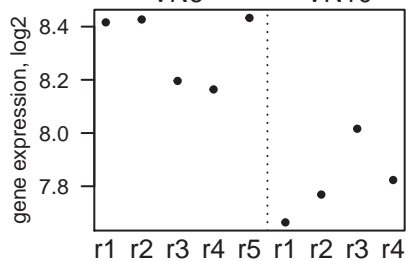**Trps1\_predicted***adj.pv=0.0364, fc=0.74*

VN6 VN10

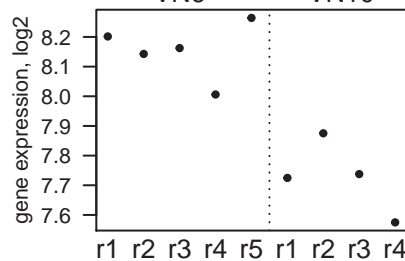**LOC499749***adj.pv=0.0374, fc=1.5*

VN6 VN10

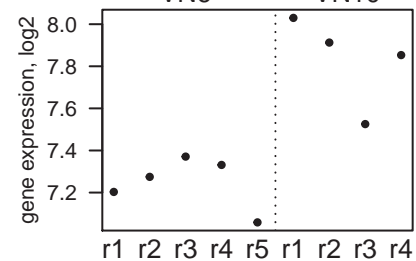**Col5a3***adj.pv=0.0381, fc=1.9*

VN6 VN10

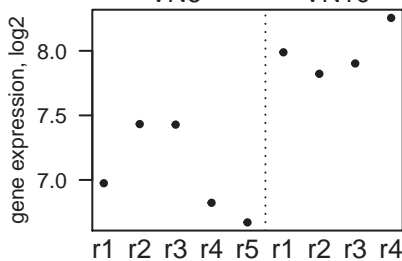**LOC687406***adj.pv=0.0381, fc=0.8*

VN6 VN10

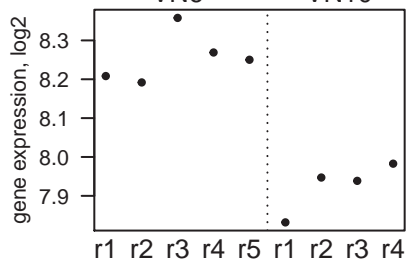**Cdc9111***adj.pv=0.0381, fc=1.46*

VN6 VN10

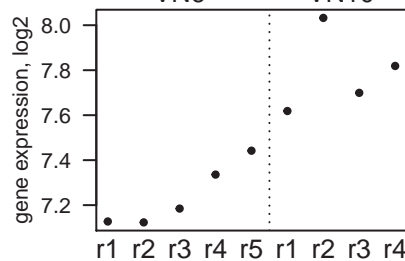**Dclk1***adj.pv=0.0381, fc=0.65*

VN6 VN10

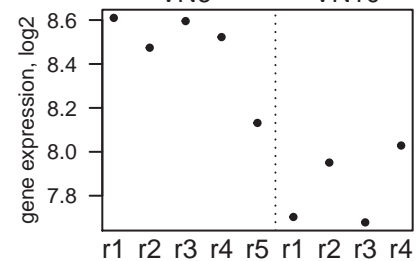**Ascl2***adj.pv=0.0406, fc=1.33*

VN6 VN10

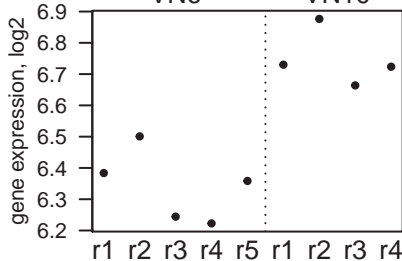**Rad23a***adj.pv=0.0425, fc=1.34*

VN6 VN10

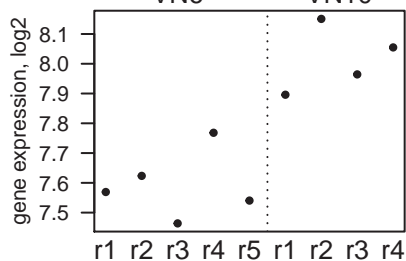**LOC501231***adj.pv=0.0448, fc=0.58*

VN6 VN10

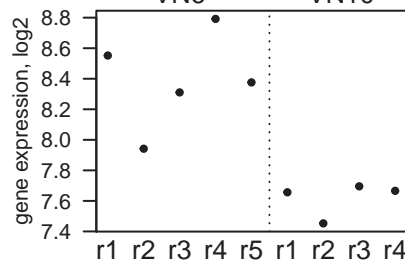**Prkcb1***adj.pv=0.0474, fc=0.72*

VN6 VN10

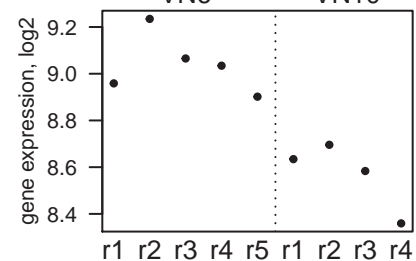

**Cbwd1***adj.pv=0.0474, fc=0.74*

VN6 VN10

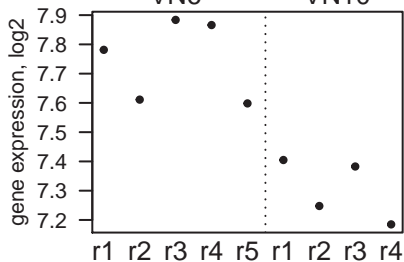**Napg***adj.pv=0.0493, fc=0.68*

VN6 VN10

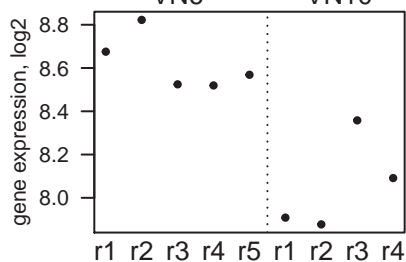**Cnnm1\_predicted***adj.pv=0.0498, fc=0.82*

VN6 VN10

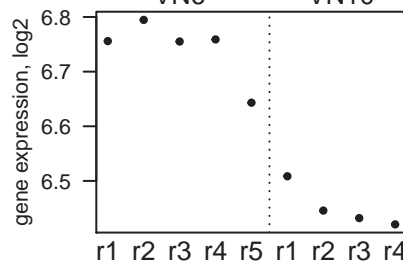**RGD1560248\_predicted***adj.pv=0.0498, fc=1.3*

VN6 VN10

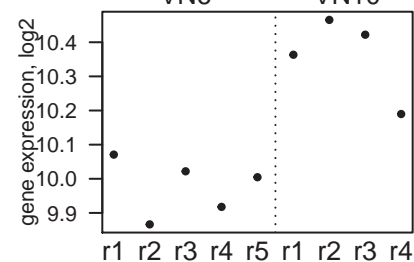**RGD1310509\_predicted***adj.pv=0.0498, fc=1.49*

VN6 VN10

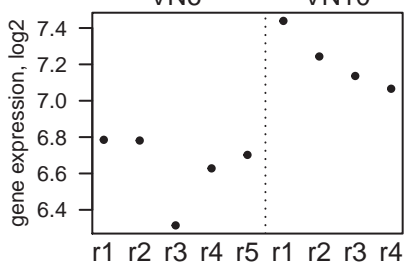**LOC501633***adj.pv=0.0498, fc=1.51*

VN6 VN10

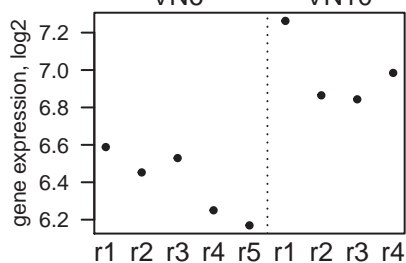**RGD1309427\_predicted***adj.pv=0.05, fc=0.75*

VN6 VN10

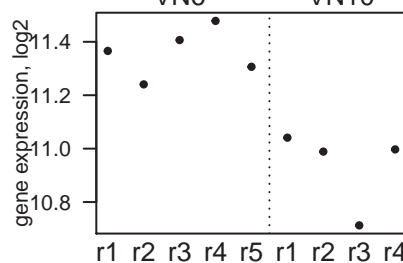**Sox9***adj.pv=0.05, fc=1.27*

VN6 VN10

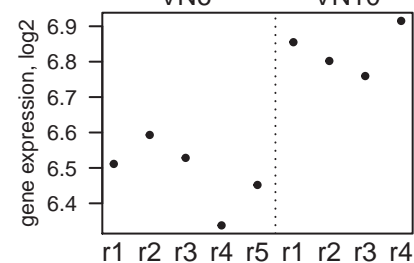**Omg***adj.pv=0.05, fc=1.36*

VN6 VN10

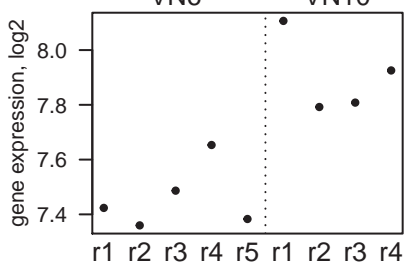**Nmnat1***adj.pv=0.05, fc=1.36*

VN6 VN10

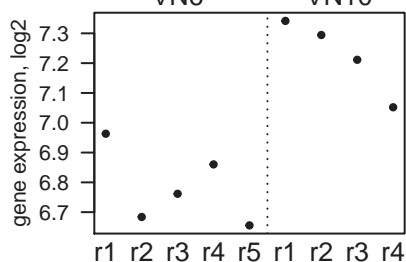**RGD1306811\_predicted***adj.pv=0.05, fc=2.07*

VN6 VN10

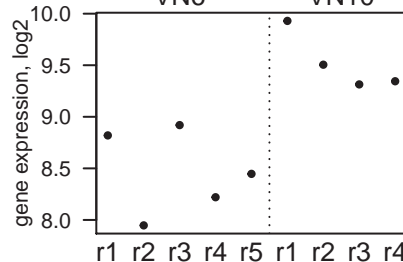**LOC363492***adj.pv=0.05, fc=1.24*

VN6 VN10

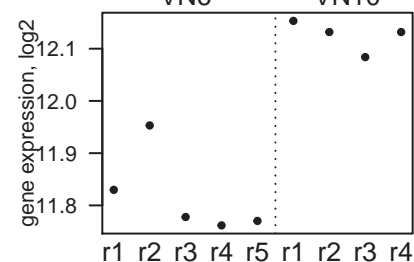

Supplement: elife-30325-fig2-data3.pdf [file elife-30325-fig2-data3.pdf]
